# Supplementary material for: Design, Synthesis, and Biological Evaluation of Novel Benzofuran Derivatives Bearing N-Aryl Piperazine Moiety
Source: PubMed Central journal article supplement (PMC6274084; doi:10.3390/molecules21121684), 2016-12-09
Supplement: molecules-21-01684-s001.pdf [file molecules-21-01684-s001.pdf]

# Supplementary Materials: Design, Synthesis and Biological Evaluation of Novel Benzofuran Derivatives Bearing *N*-Aryl Piperazine Moiety

Yulu Ma, Xi Zheng, Hui Gao, Chunping Wan, Gaoxiong Rao and Zewei Mao

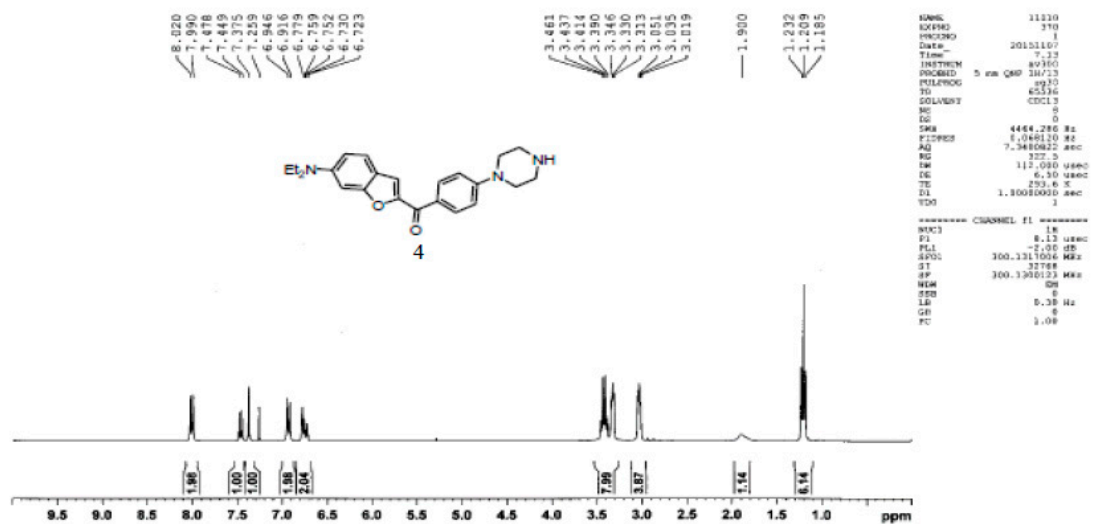

Figure S1. <sup>1</sup>H-NMR spectrum of compound 4.

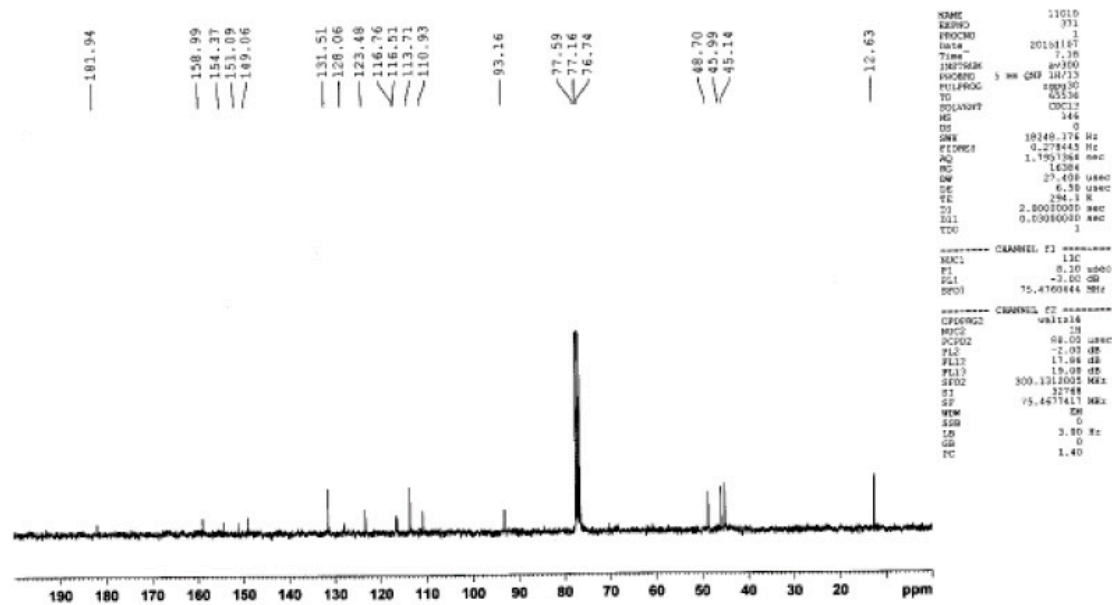

Figure S2. <sup>13</sup>C-NMR spectrum of compound 4.

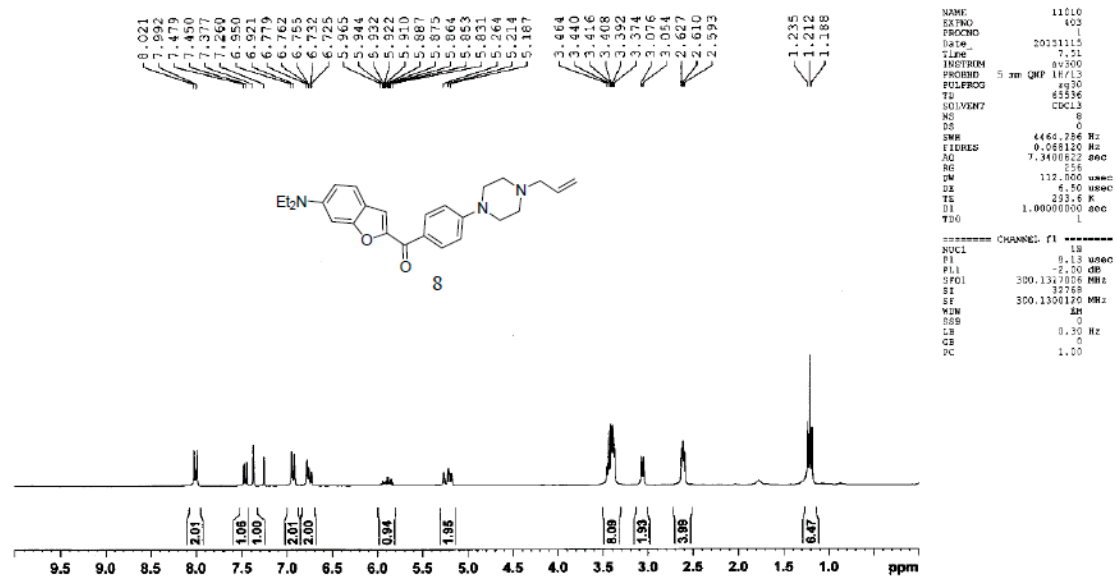Figure S3. <sup>1</sup>H-NMR spectrum of compound 8.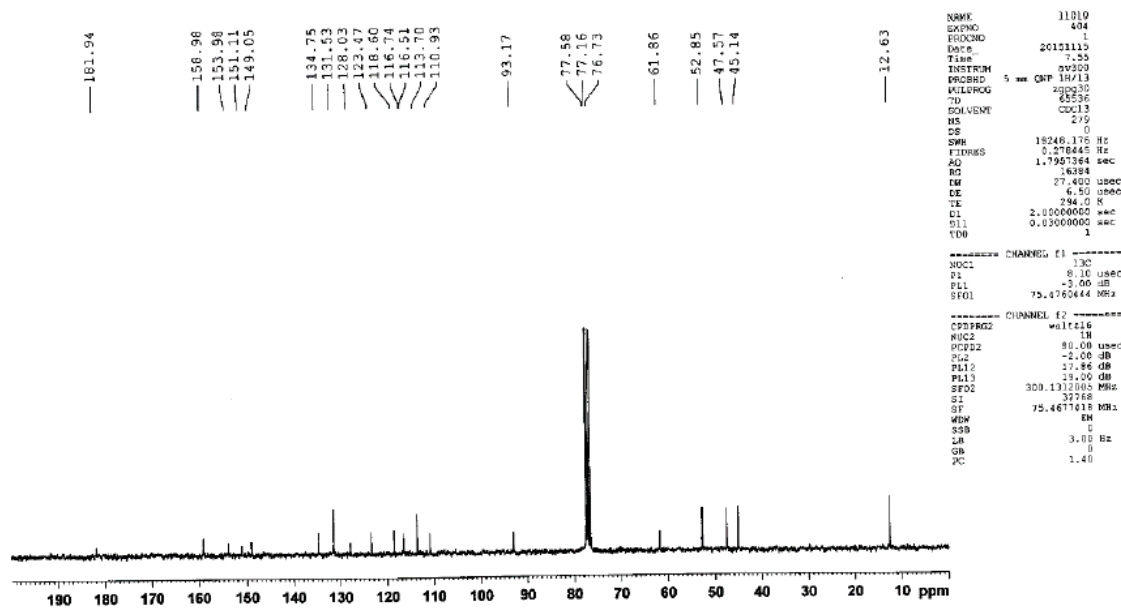Figure S4. <sup>13</sup>C-NMR spectrum of compound 8.

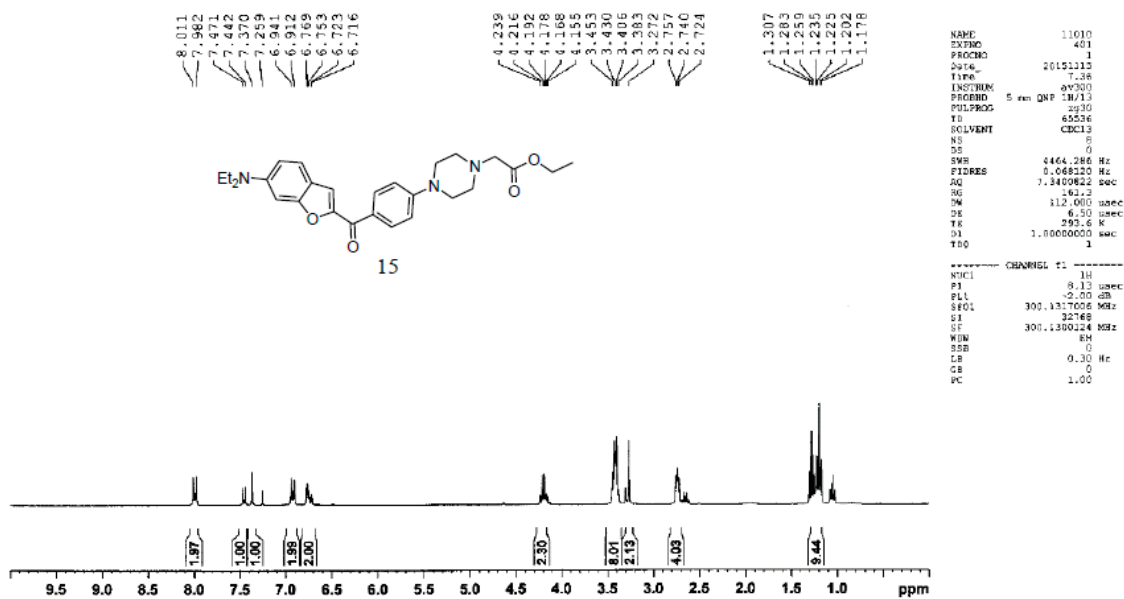Figure S5. <sup>1</sup>H-NMR spectrum of compound 15.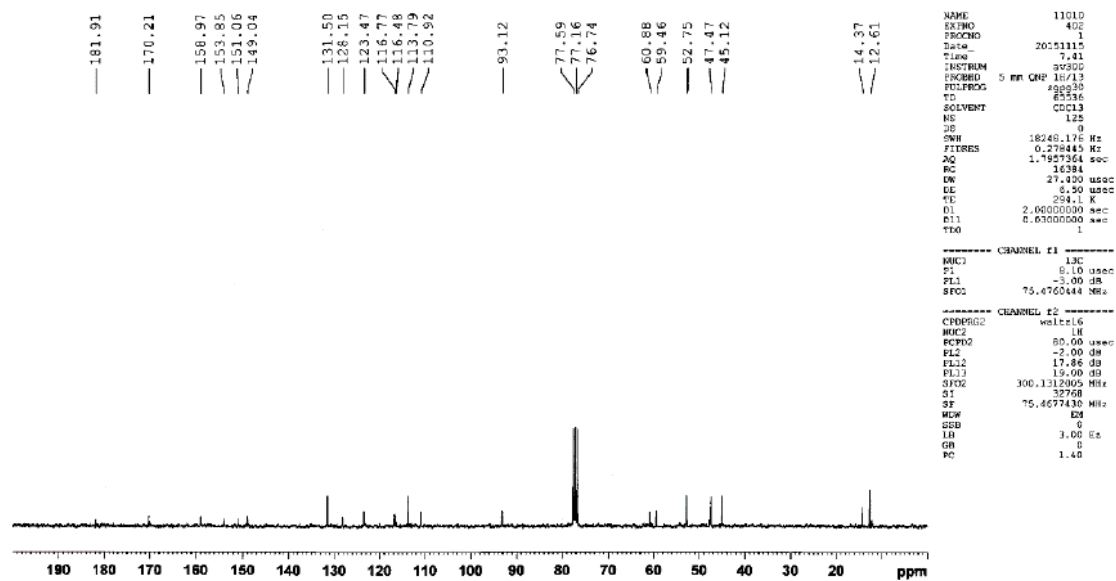Figure S6. <sup>13</sup>C-NMR spectrum of compound 15.

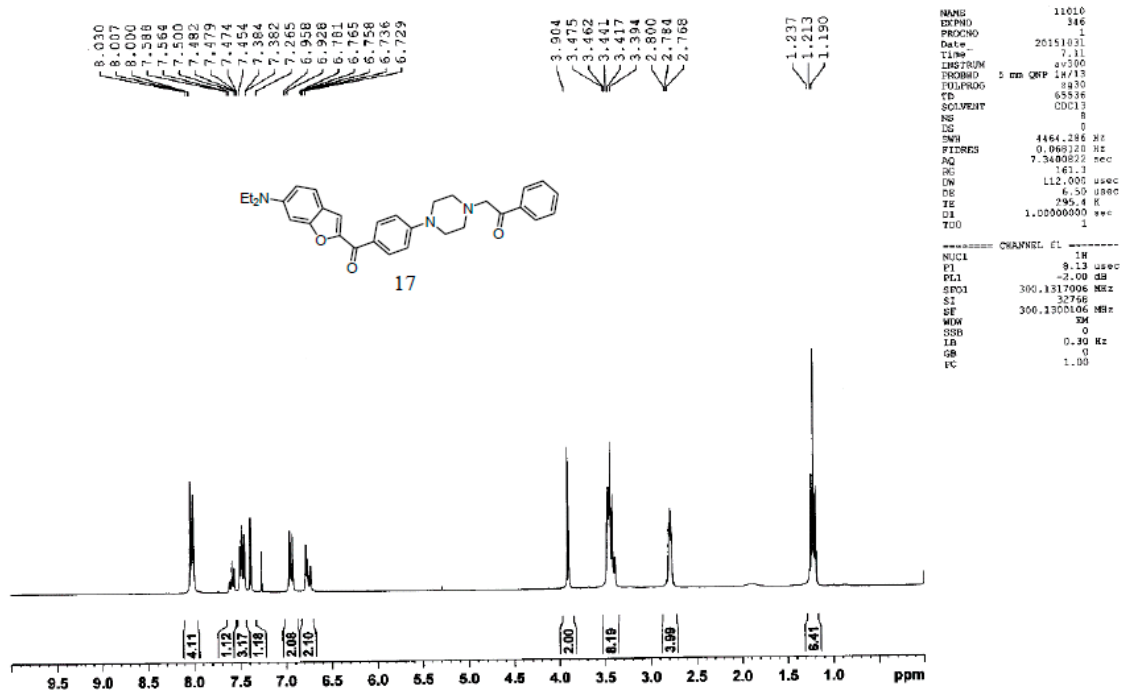

Figure S7. <sup>1</sup>H-NMR spectrum of compound 17.

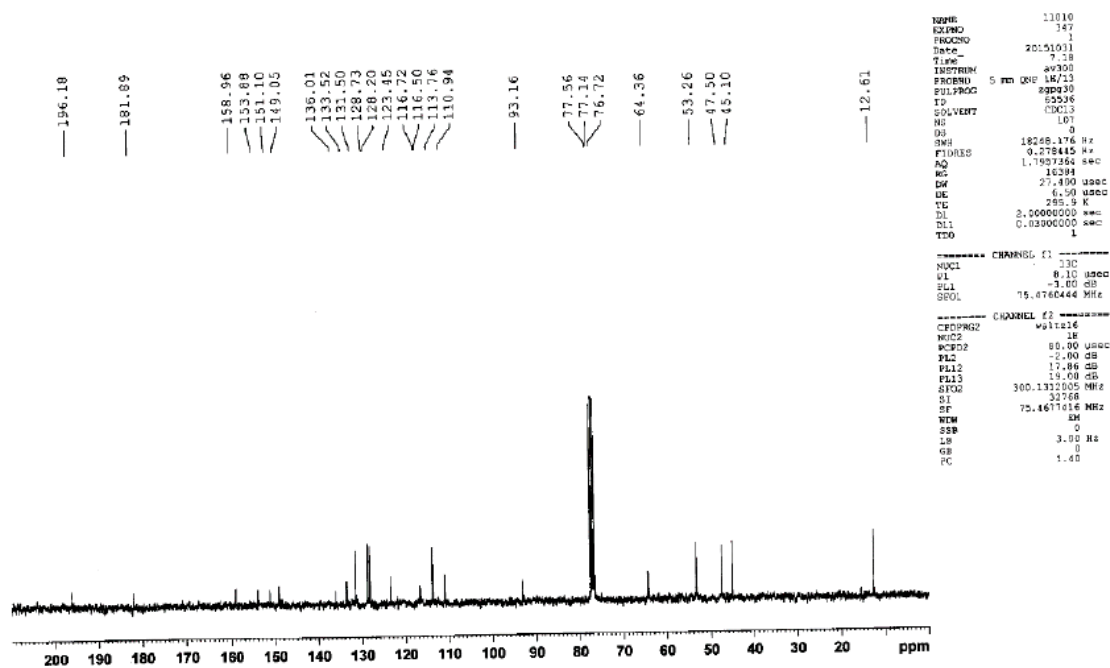

Figure S8. <sup>13</sup>C-NMR spectrum of compound 17.



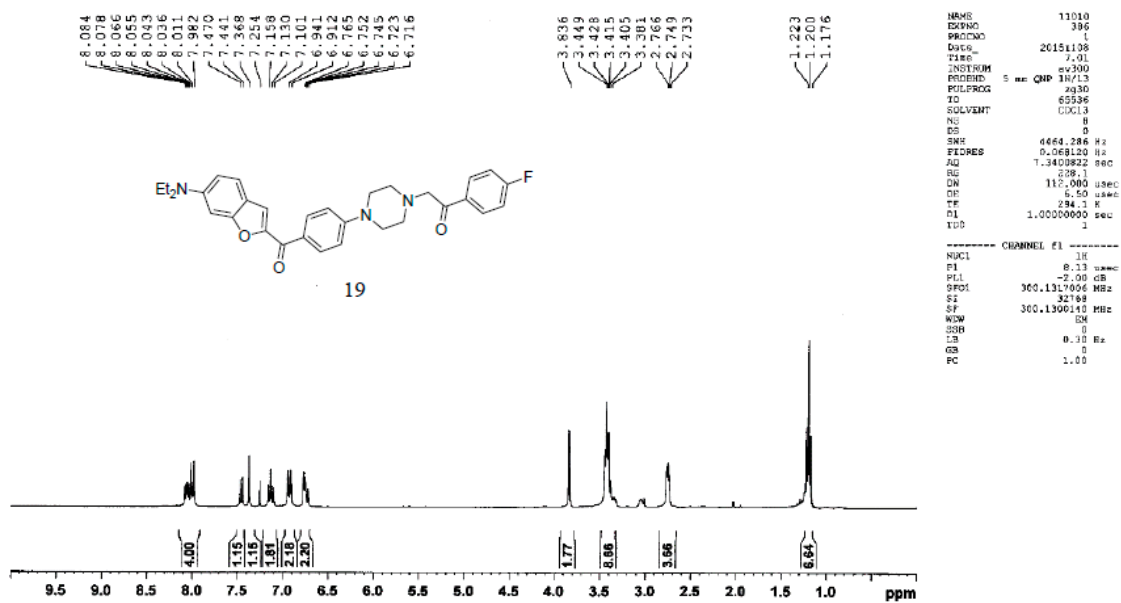

Figure S11. <sup>1</sup>H-NMR spectrum of compound 19.

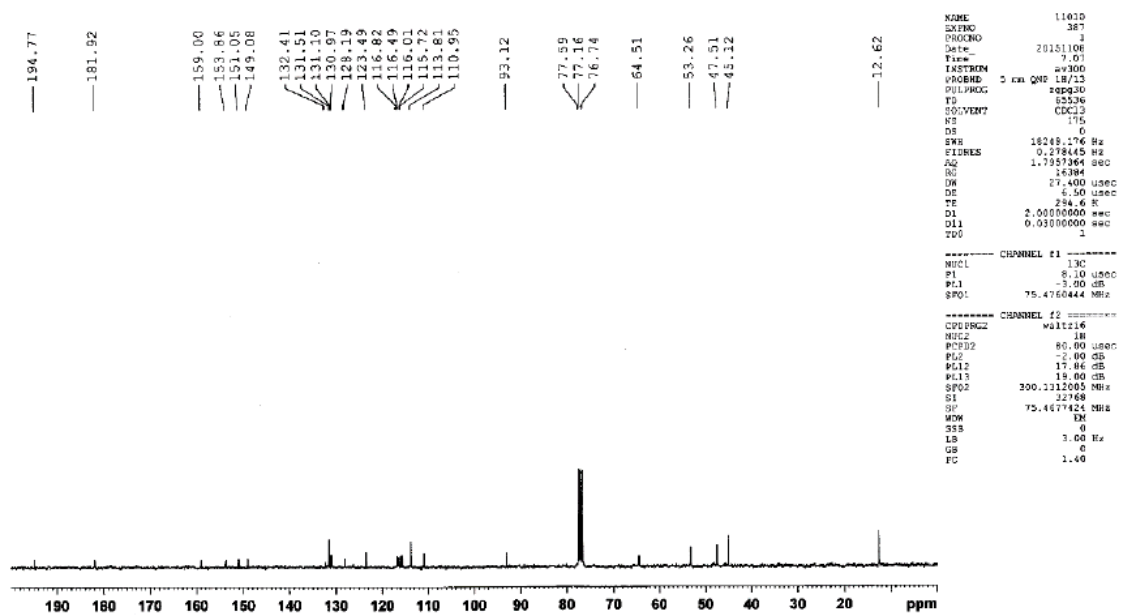

Figure S12. <sup>13</sup>C-NMR spectrum of compound 19.

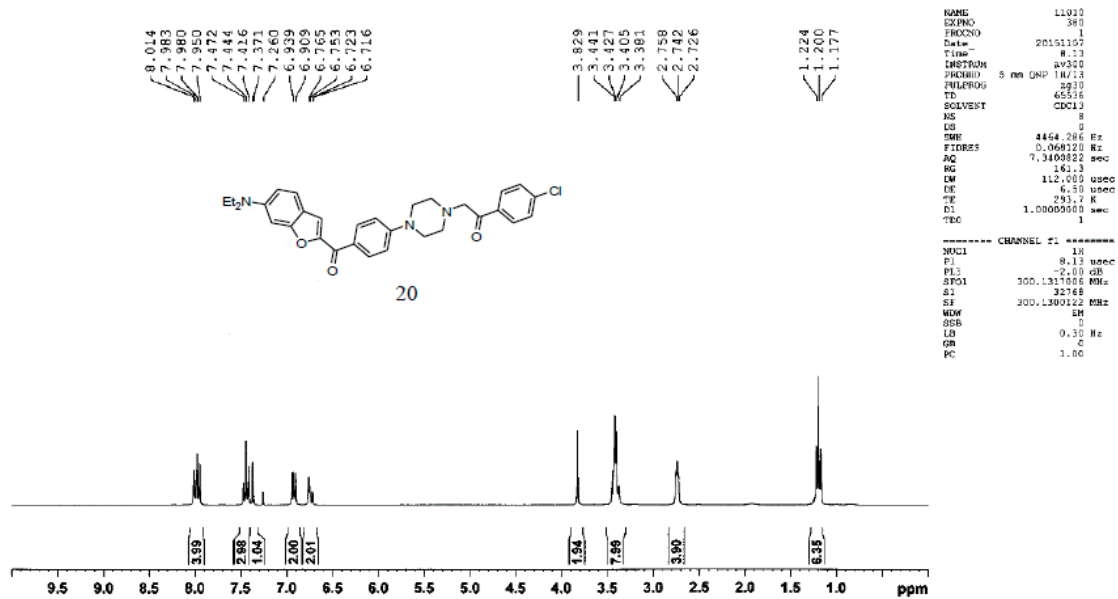

Figure S13. <sup>1</sup>H-NMR spectrum of compound 20.

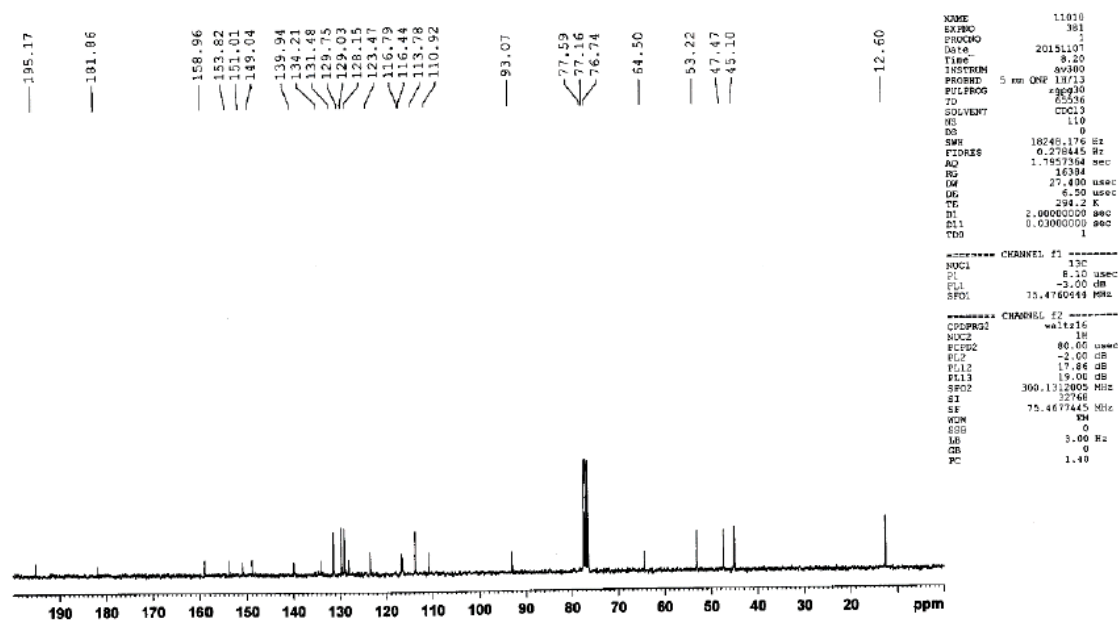

Figure S14. <sup>13</sup>C-NMR spectrum of compound 20.

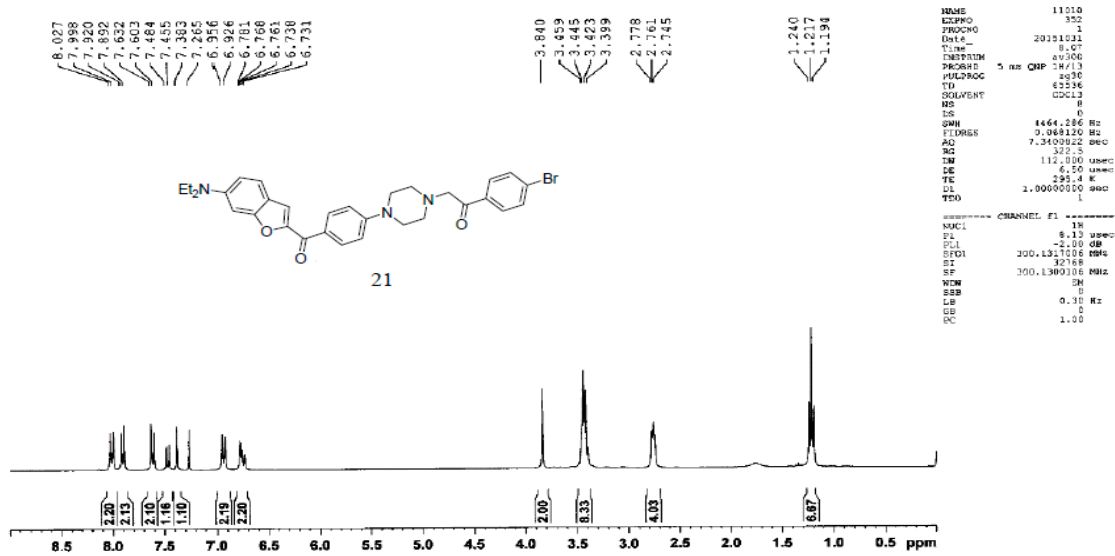

Figure S15. <sup>1</sup>H-NMR spectrum of compound 21.

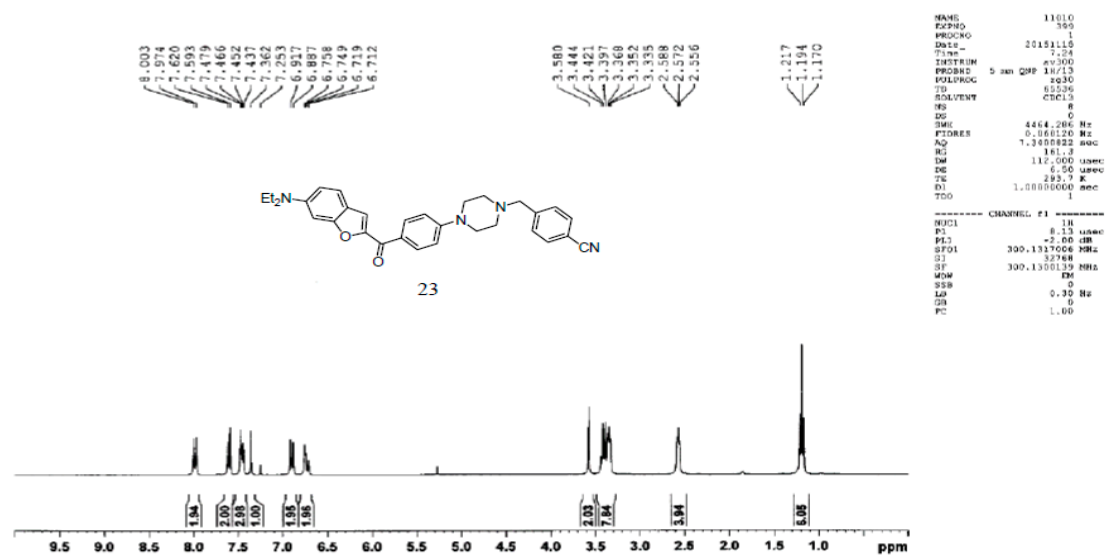

Figure S16. <sup>1</sup>H-NMR spectrum of compound 23.



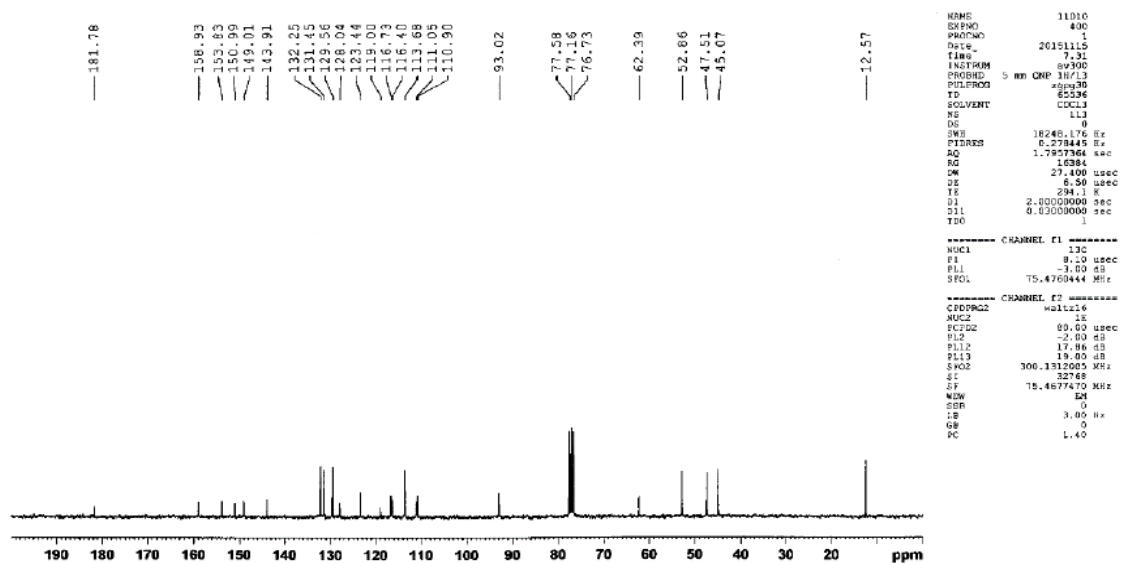

Figure S17. <sup>13</sup>C-NMR spectrum of compound 23.

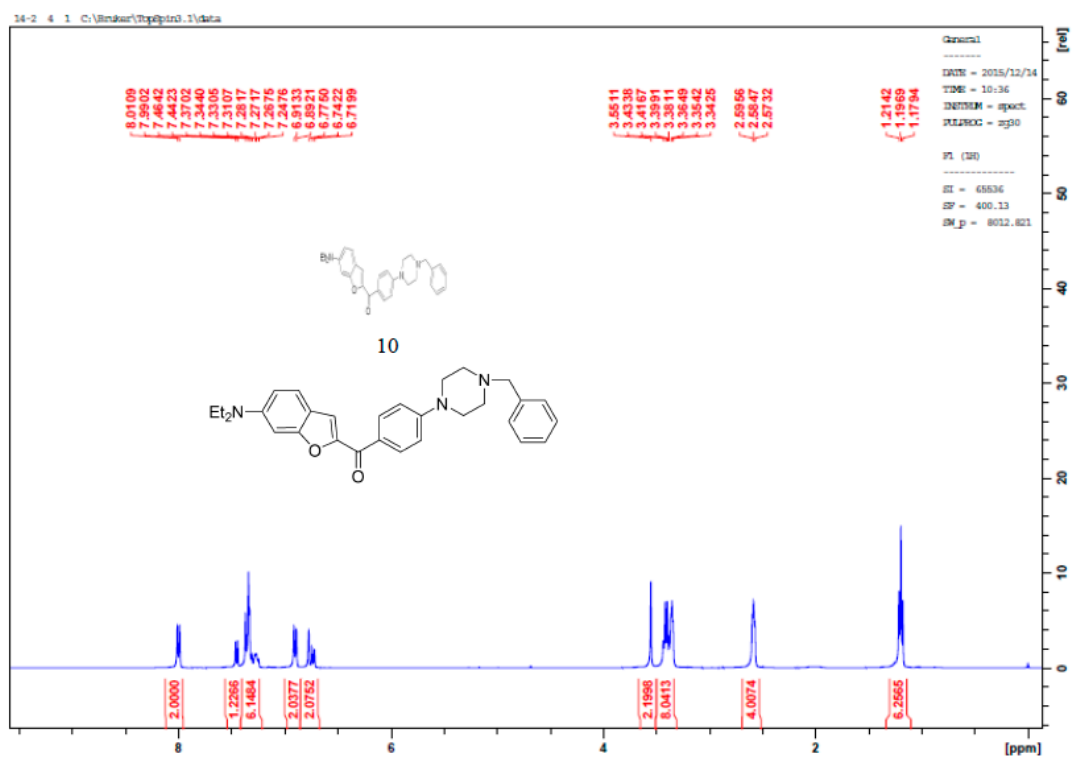

Figure S18. <sup>1</sup>H-NMR spectrum of compound 10.

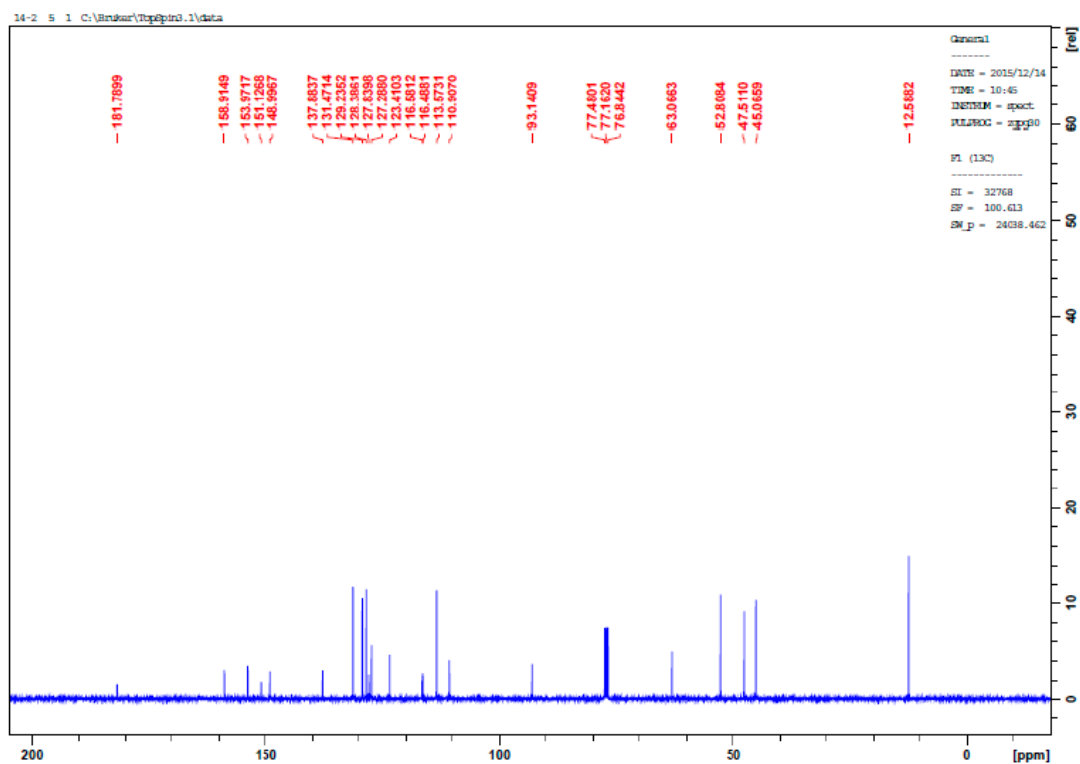Figure S19. <sup>13</sup>C-NMR spectrum of compound 10.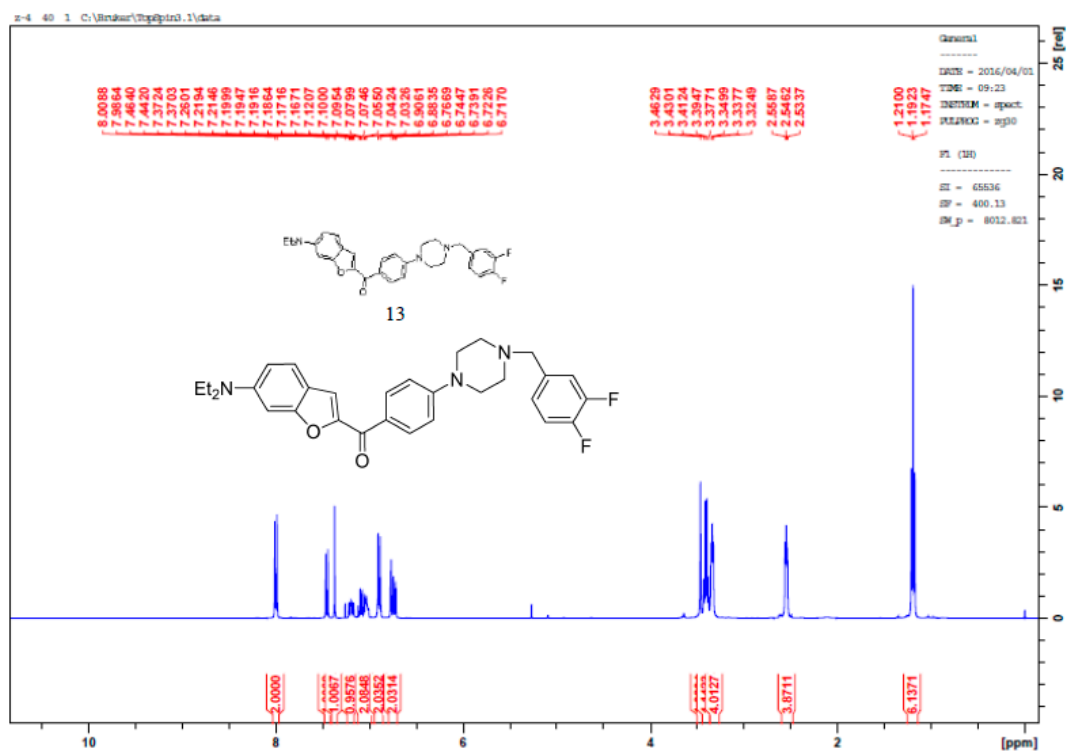Figure S20. <sup>1</sup>H-NMR spectrum of compound 13.

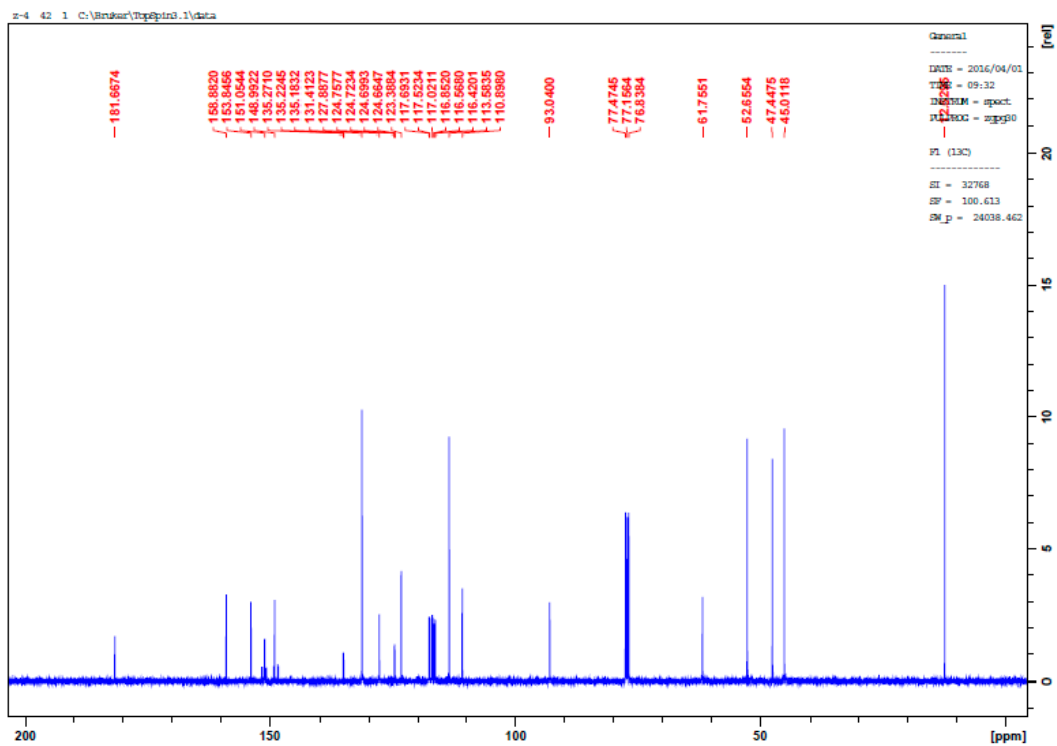Figure S21. <sup>13</sup>C-NMR spectrum of compound 13.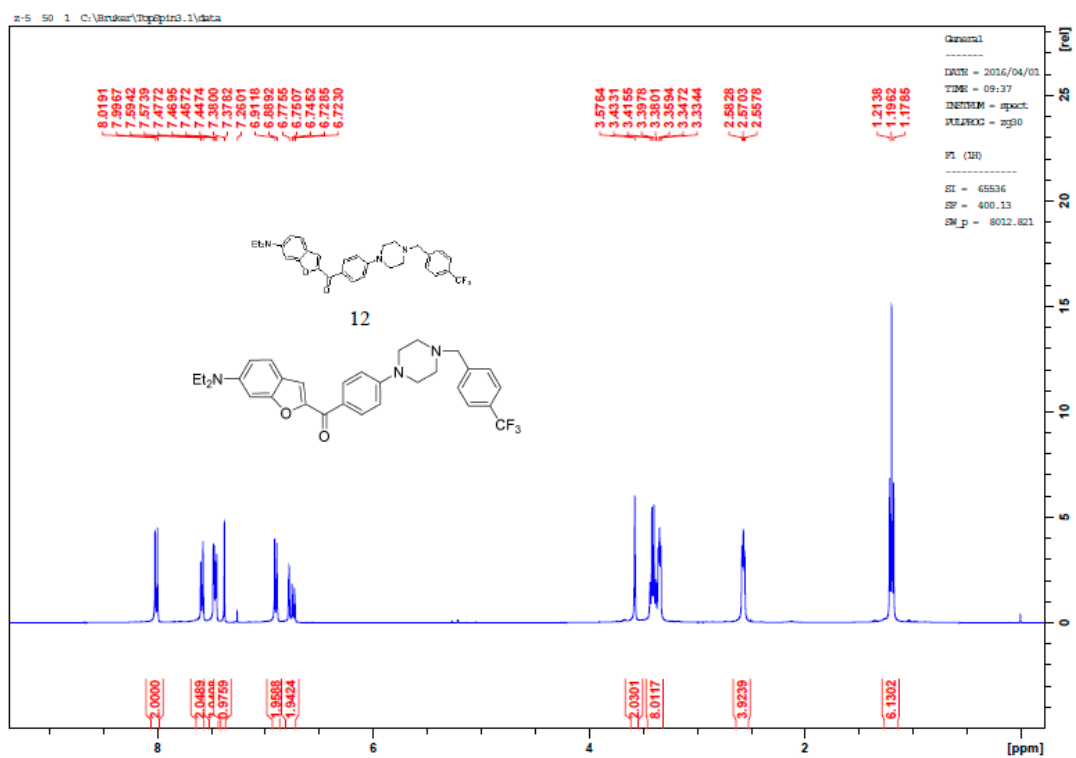Figure S22. <sup>1</sup>H-NMR spectrum of compound 12.

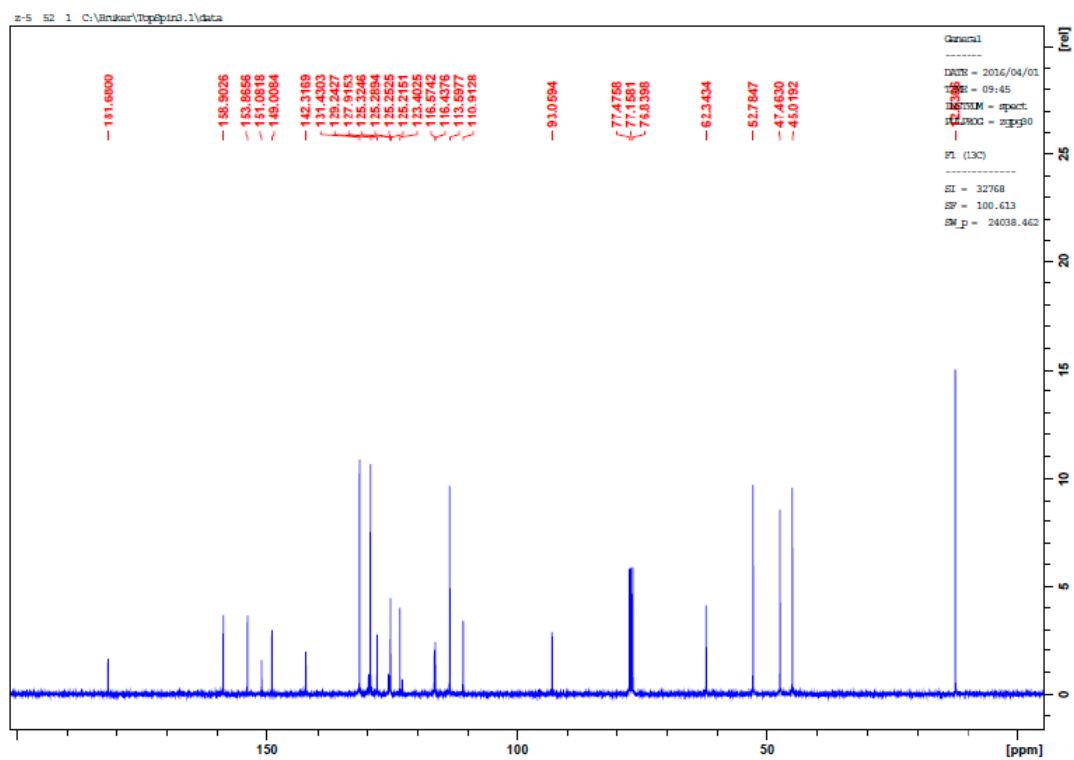Figure S23.  $^{13}\text{C}$ -NMR spectrum of compound 12.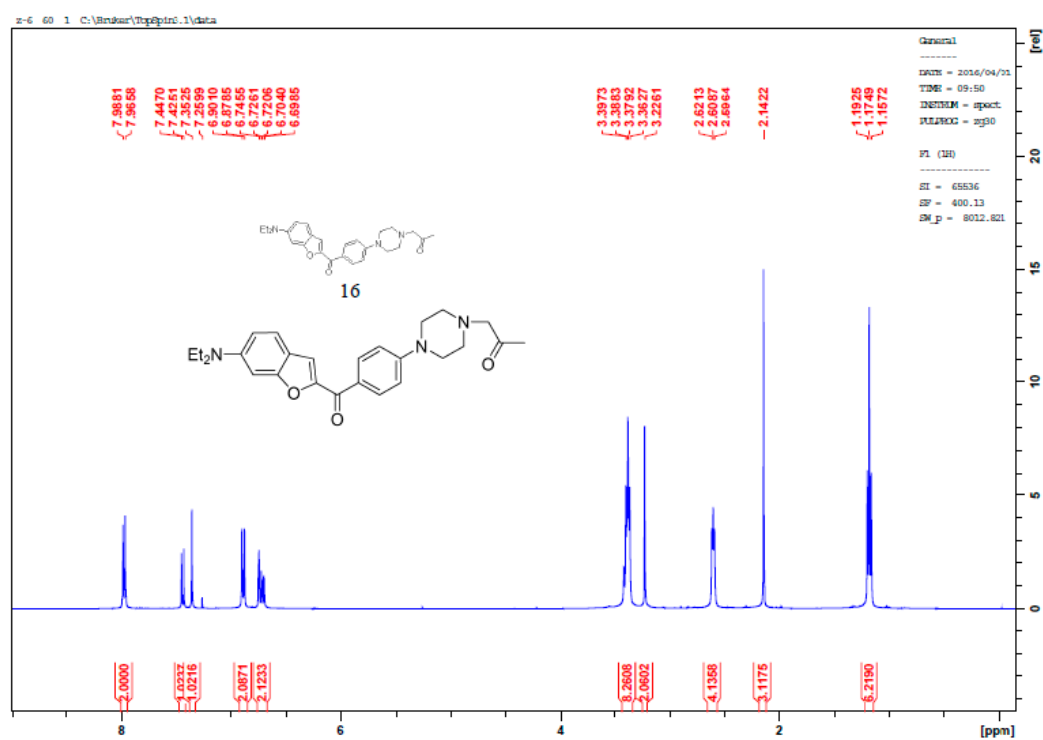Figure S24.  $^1\text{H}$ -NMR spectrum of compound 16.

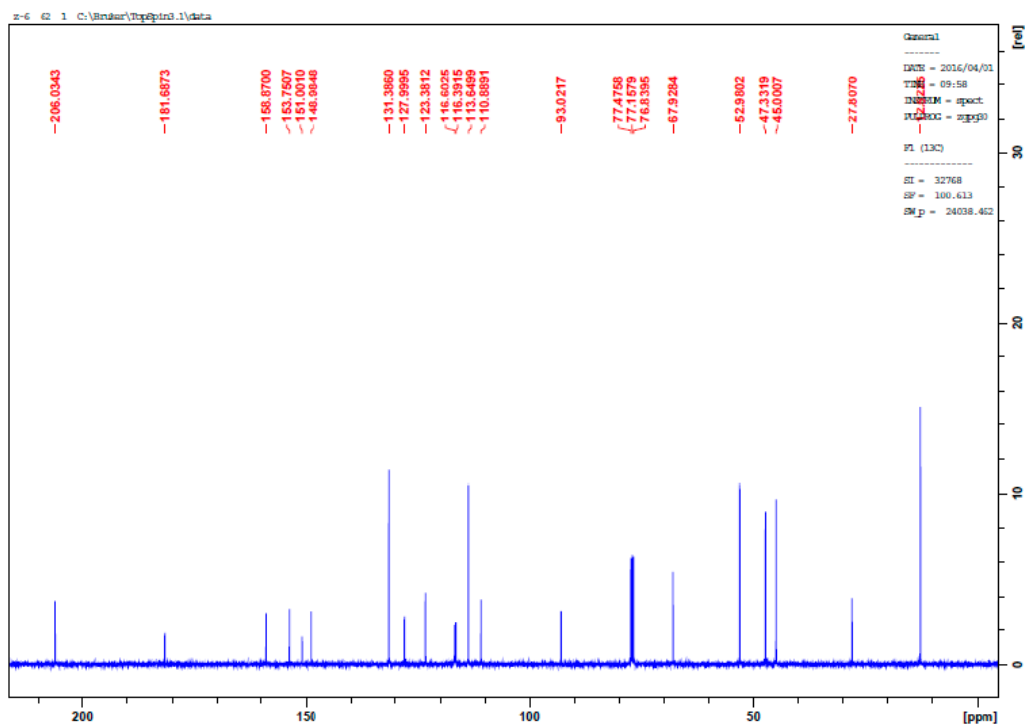Figure S25. <sup>13</sup>C-NMR spectrum of compound 16.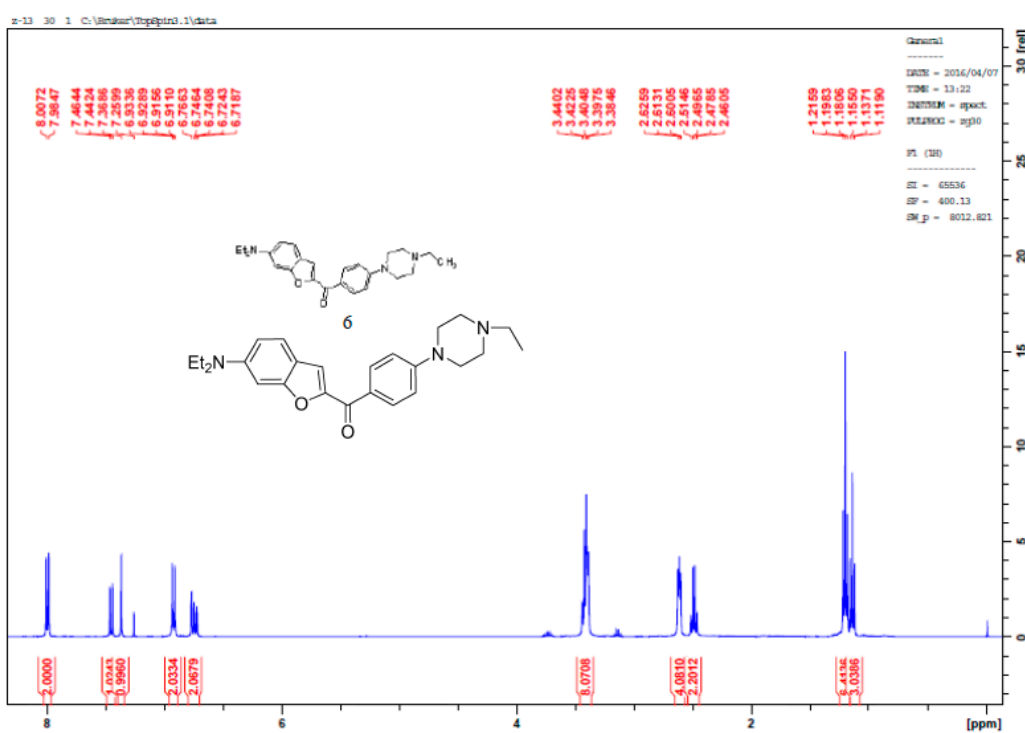Figure S26. <sup>1</sup>H-NMR spectrum of compound 6.

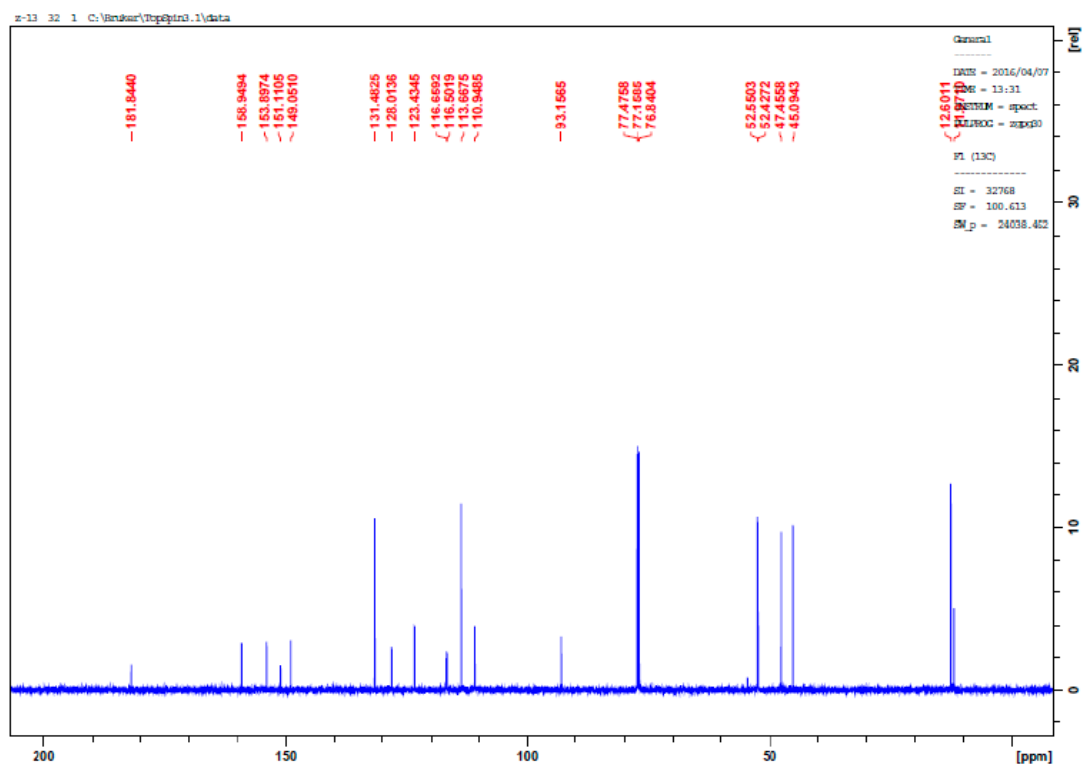Figure S27.  $^{13}\text{C}$ -NMR spectrum of compound 6.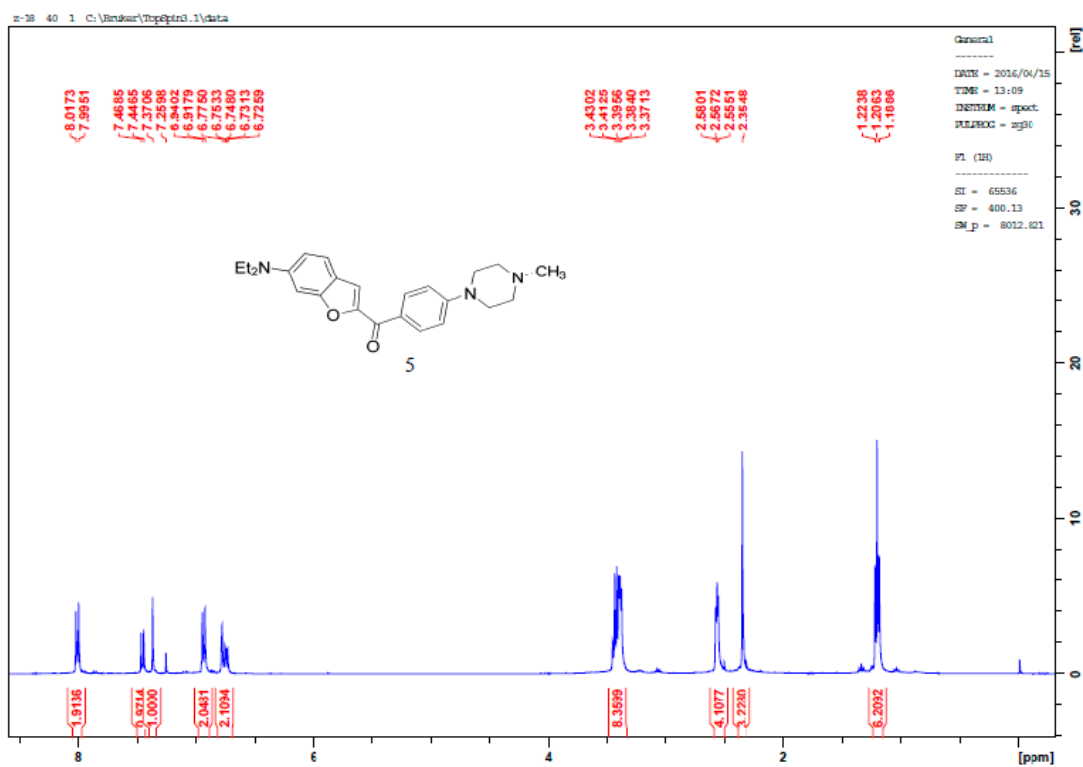Figure S28.  $^1\text{H}$ -NMR spectrum of compound 5

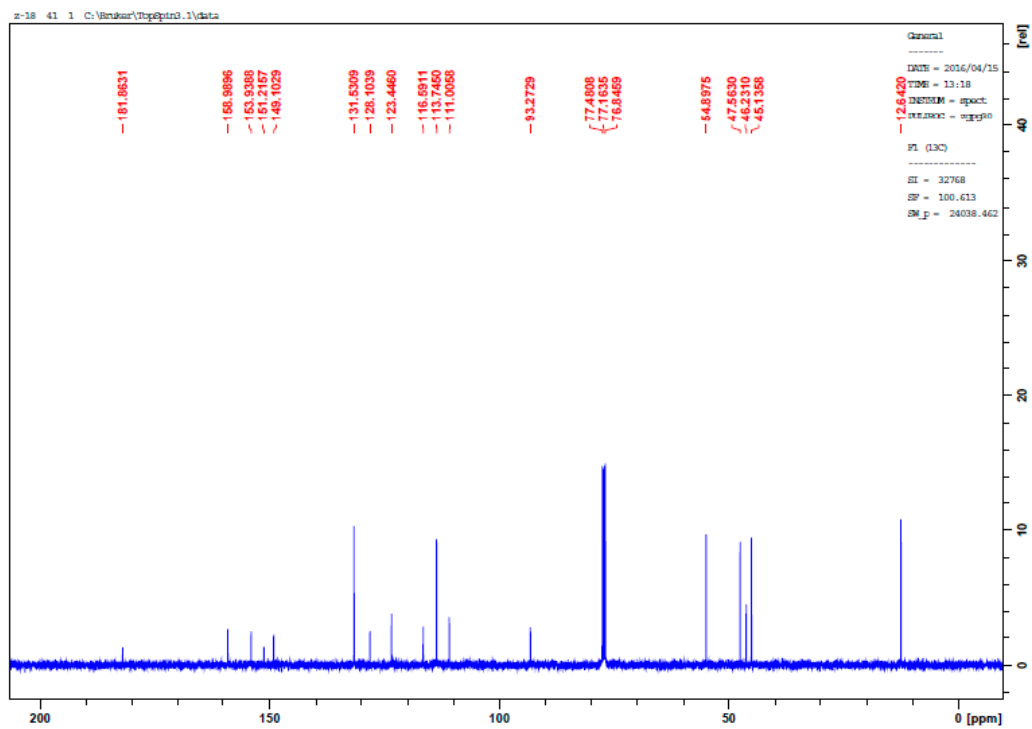Figure S29.  $^{13}\text{C}$ -NMR spectrum of compound 5.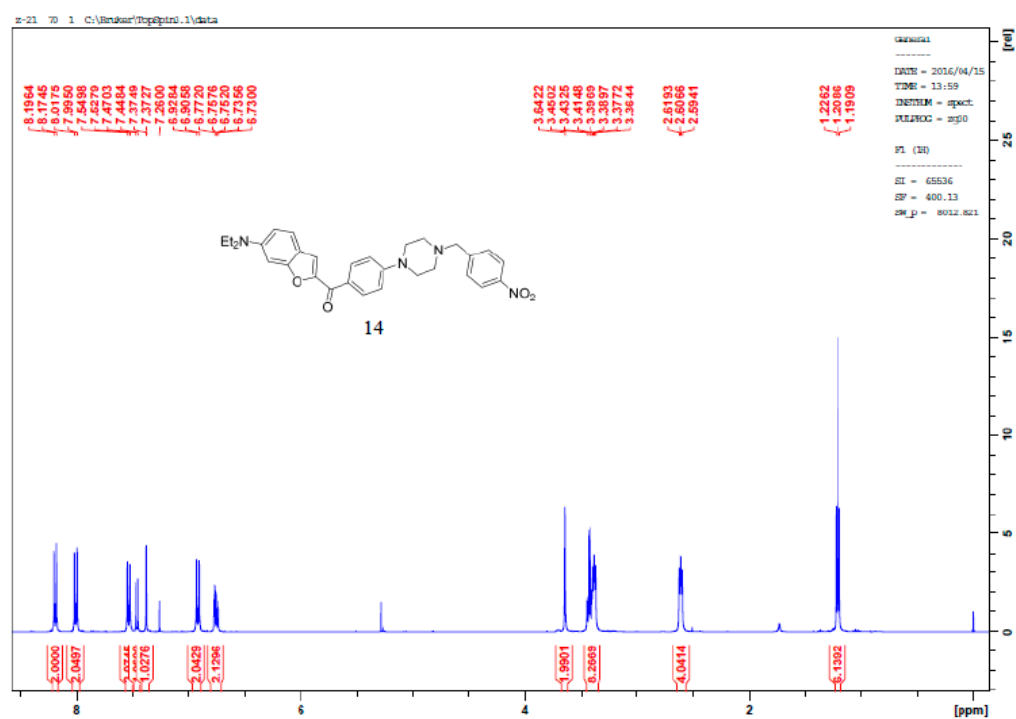Figure S30.  $^1\text{H}$ -NMR spectrum of compound 14.

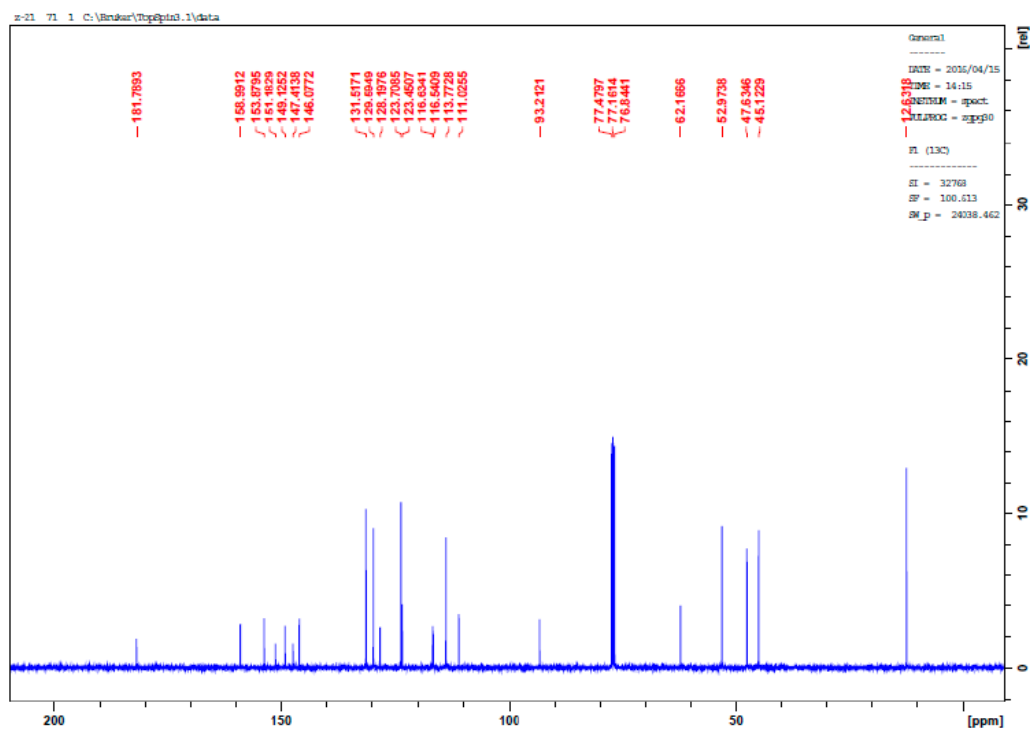Figure S31.  $^{13}\text{C}$ -NMR spectrum of compound 14.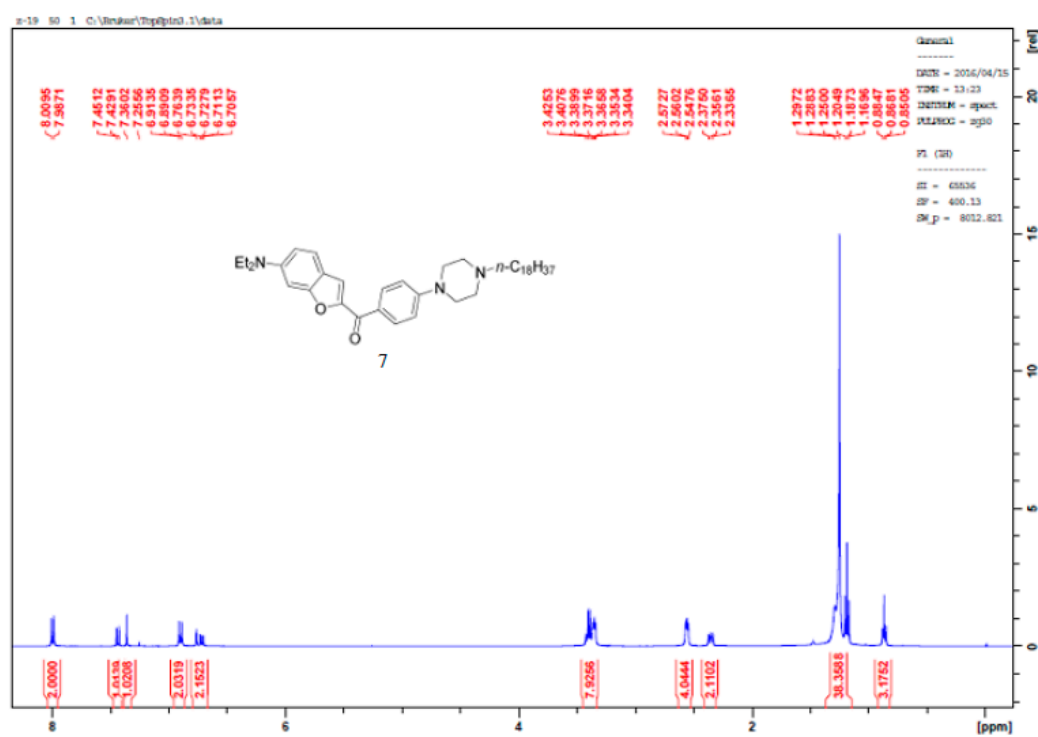Figure S32.  $^1\text{H}$ -NMR spectrum of compound 7.



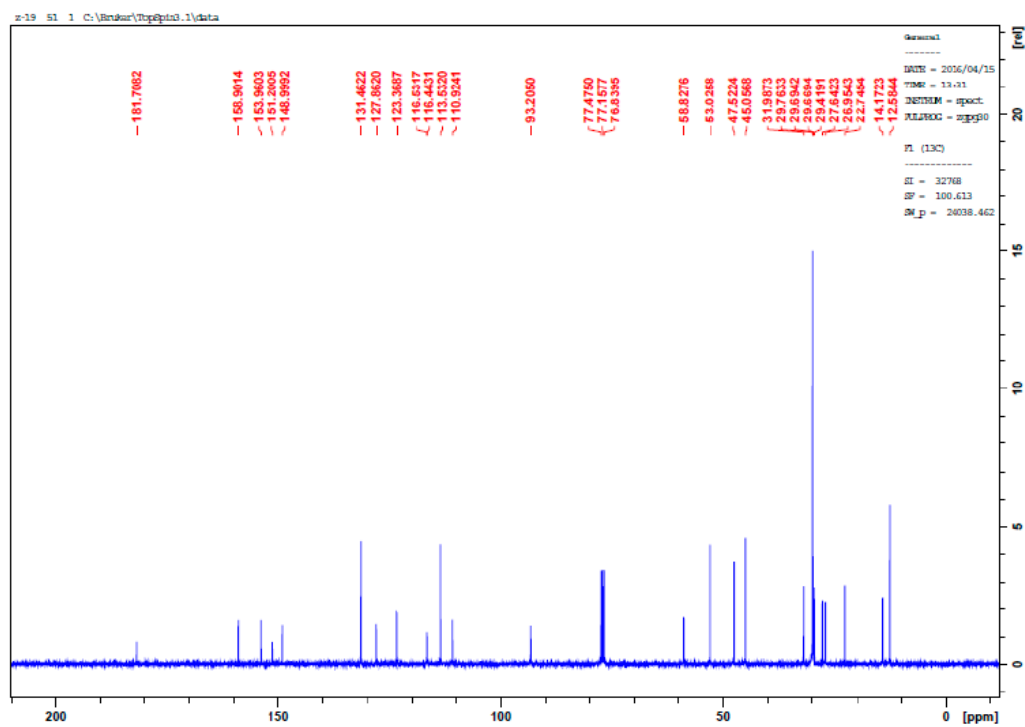Figure S33. <sup>13</sup>C-NMR spectrum of compound 7.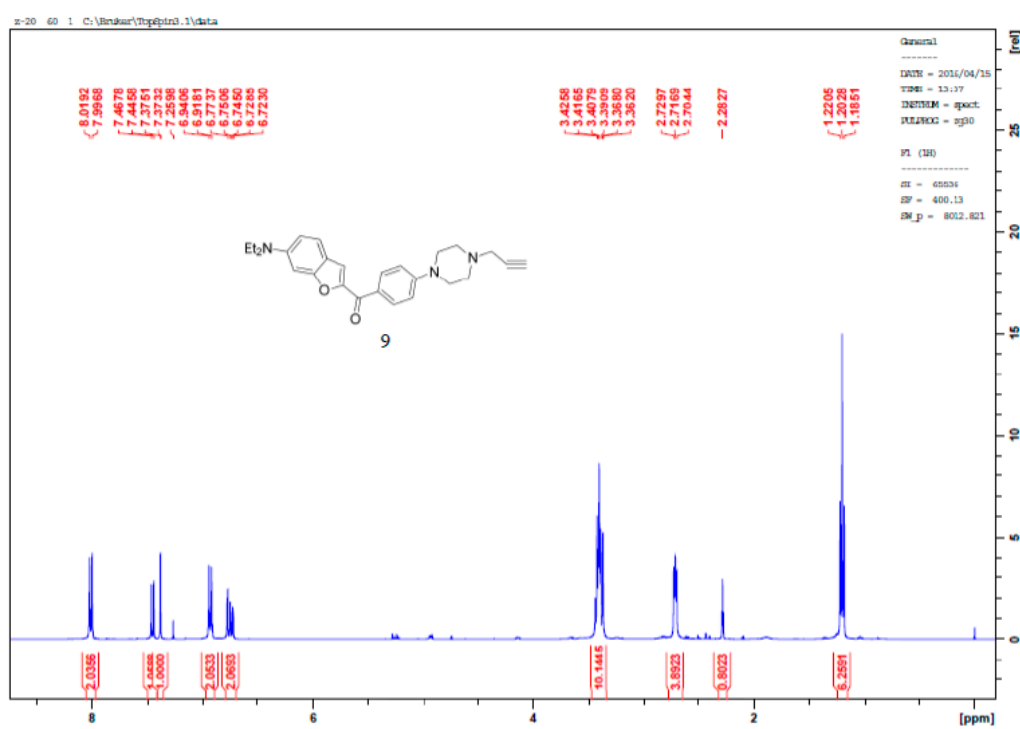Figure S34. <sup>1</sup>H-NMR spectrum of compound 9.

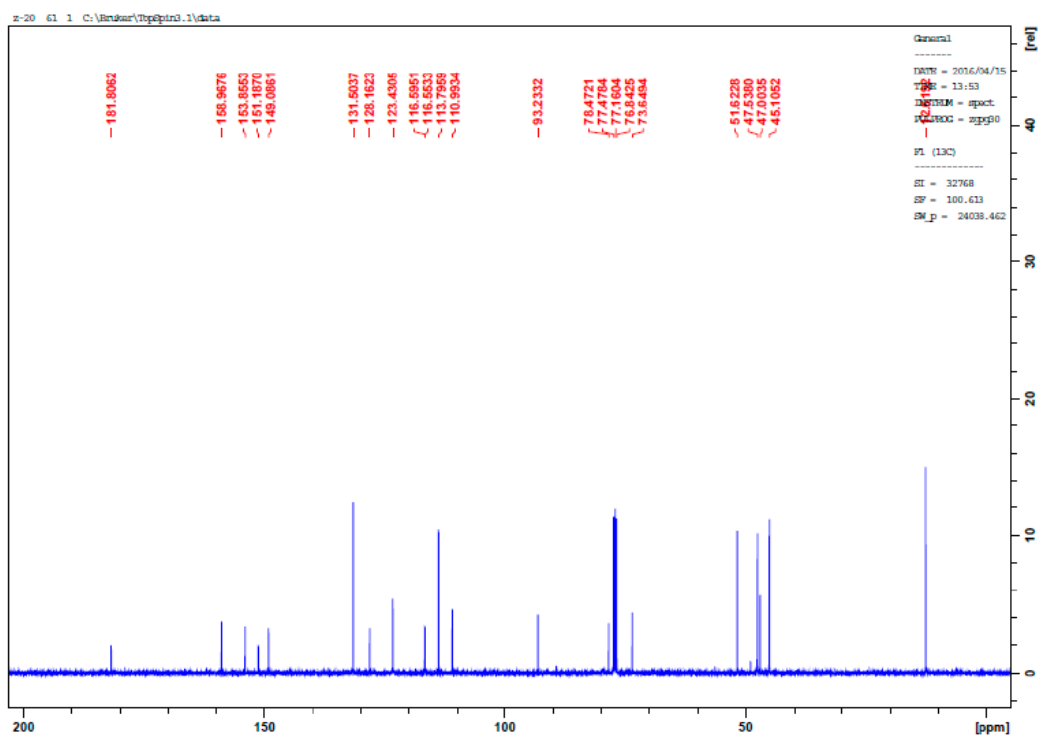Figure S35.  $^{13}\text{C}$ -NMR spectrum of compound 9.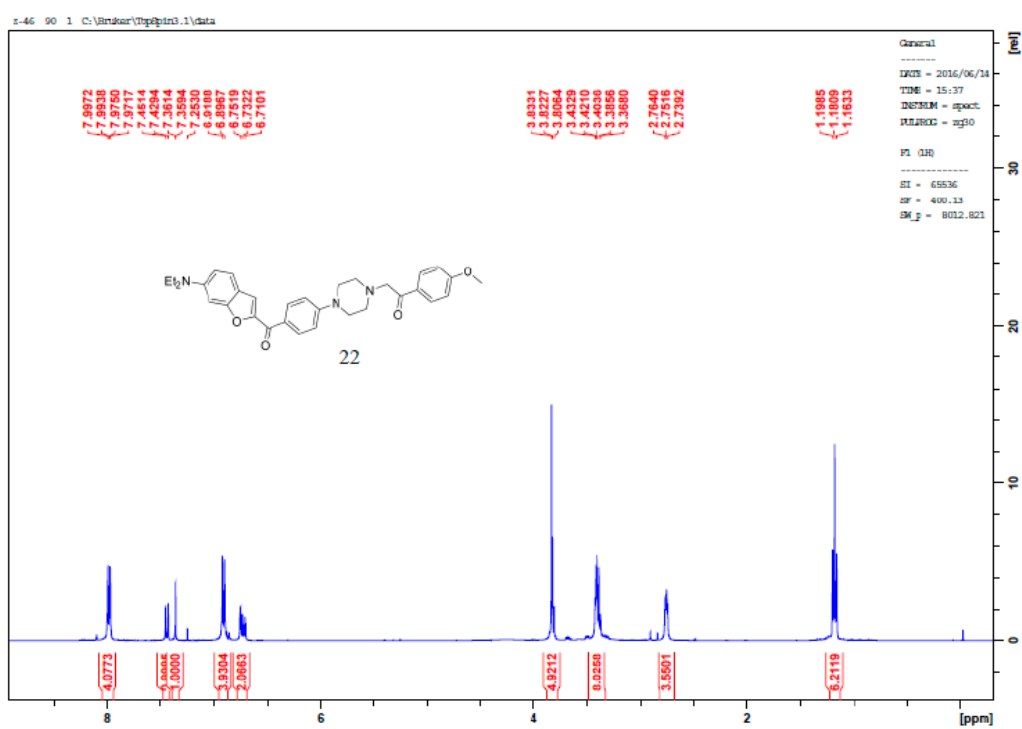Figure S36.  $^1\text{H}$ -NMR spectrum of compound 22.

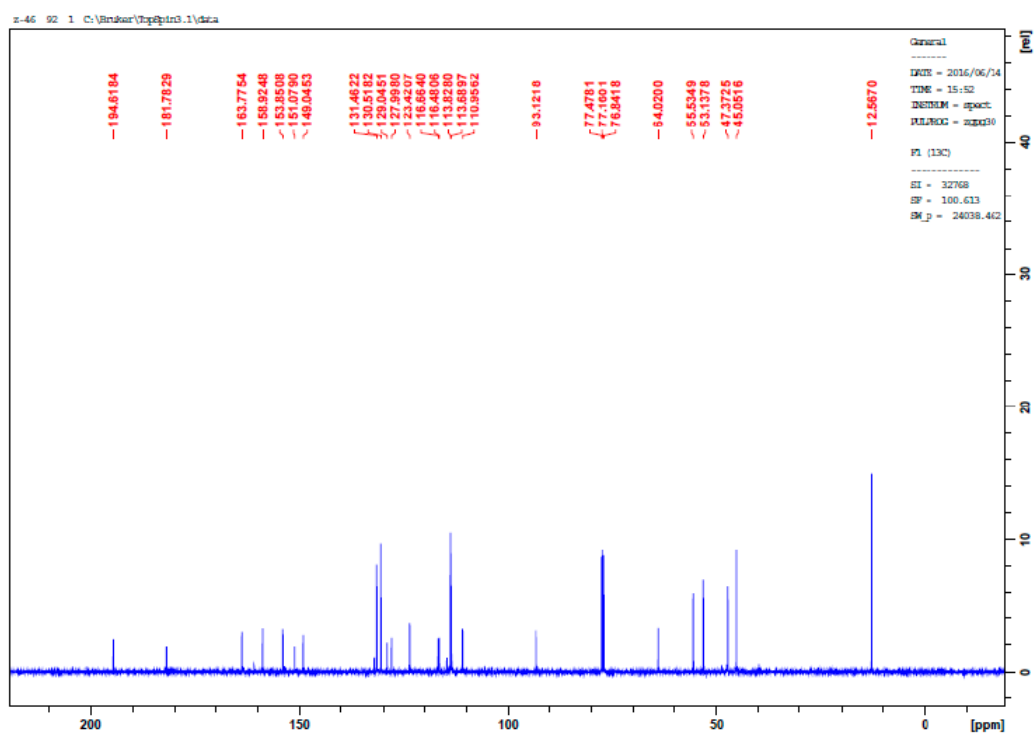Figure S37. <sup>13</sup>C-NMR spectrum of compound 22.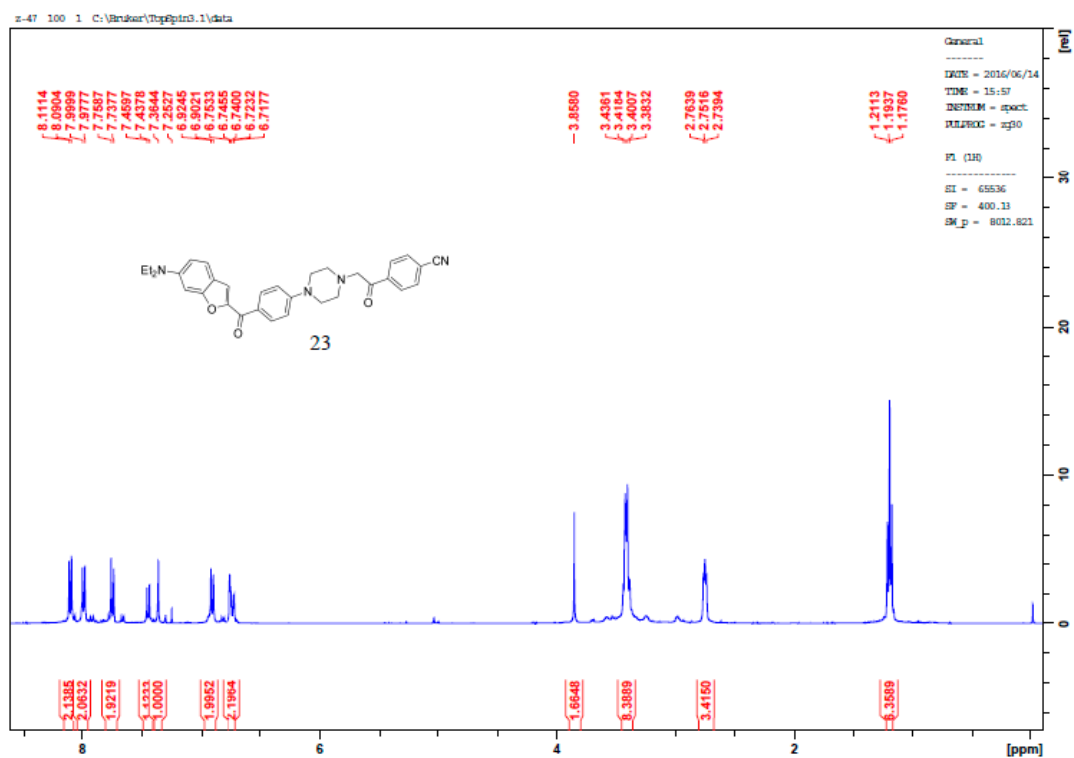Figure S38. <sup>1</sup>H-NMR spectrum of compound 23.

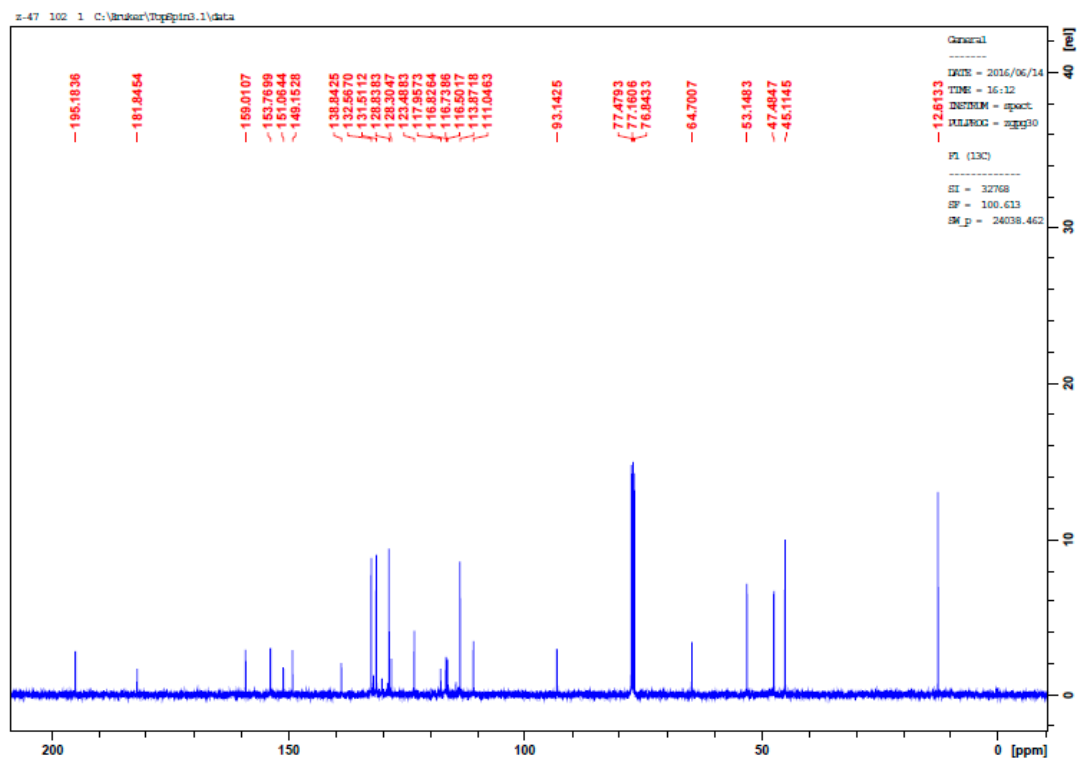Figure S39.  $^{13}\text{C}$ -NMR spectrum of compound 23.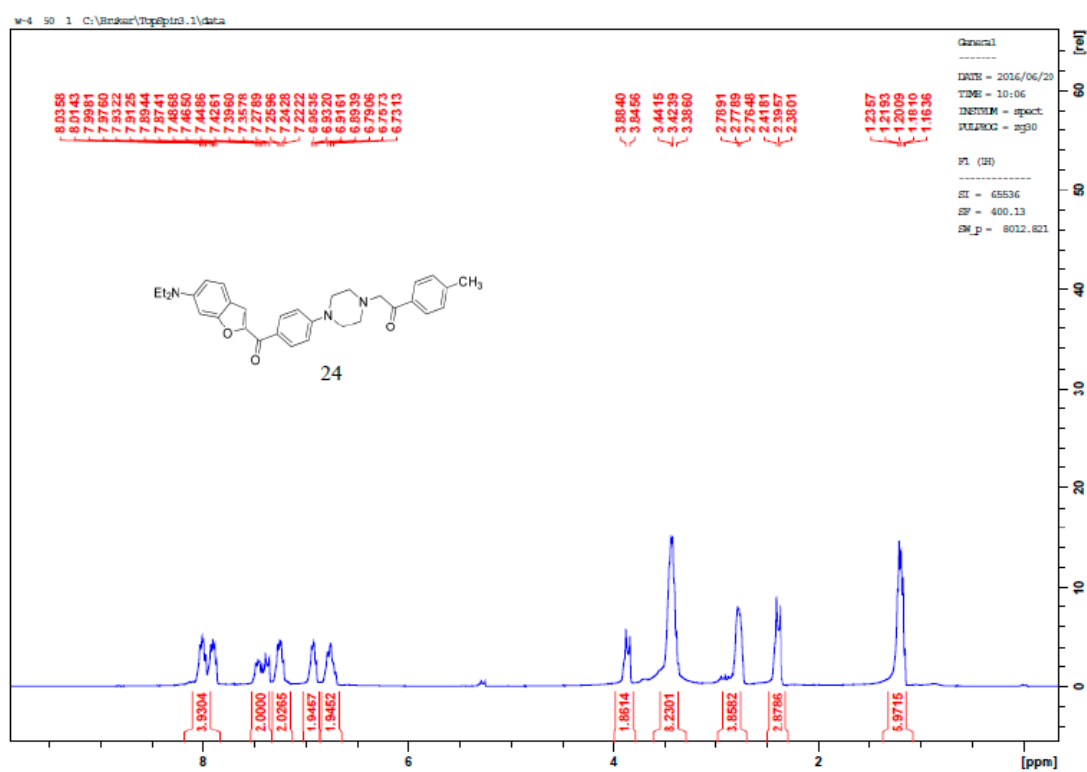Figure S40.  $^1\text{H}$ -NMR spectrum of compound 24.

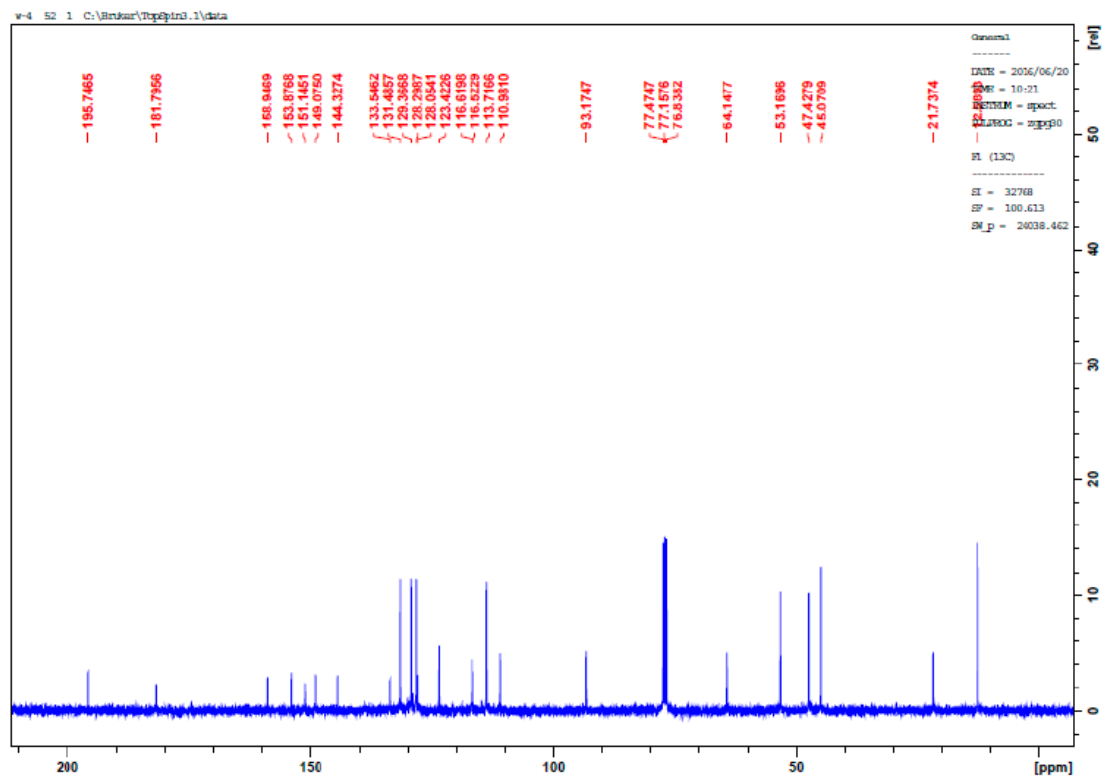Figure S41. <sup>13</sup>C-NMR spectrum of compound 24.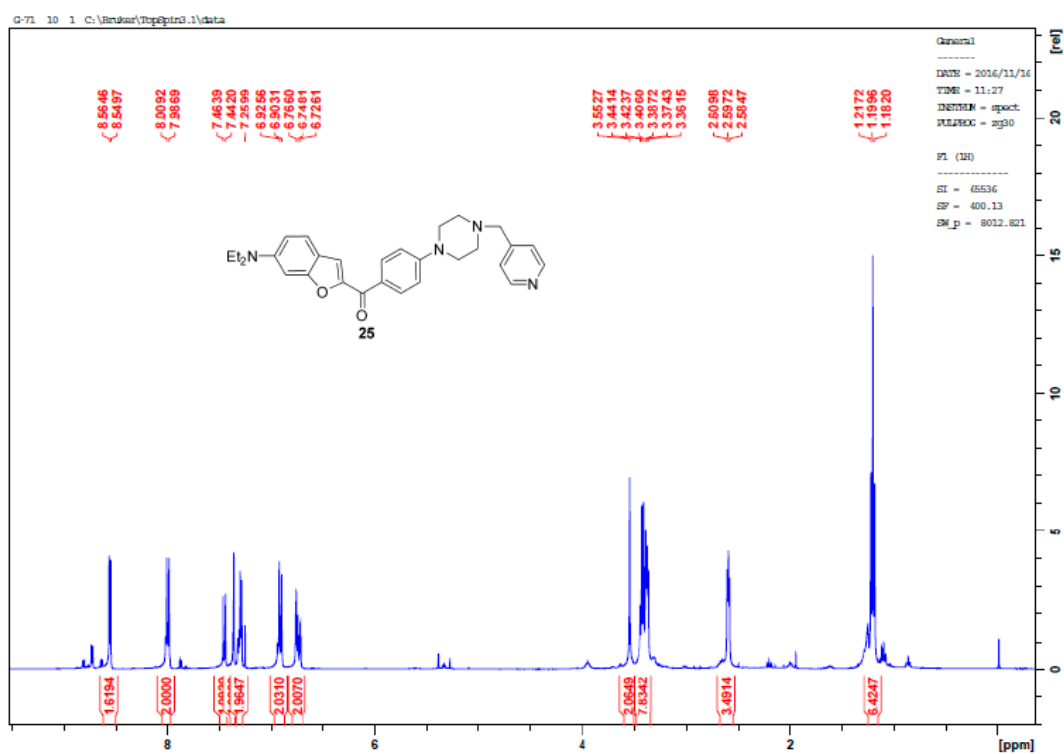Figure S42. <sup>1</sup>H-NMR spectrum of compound 25.

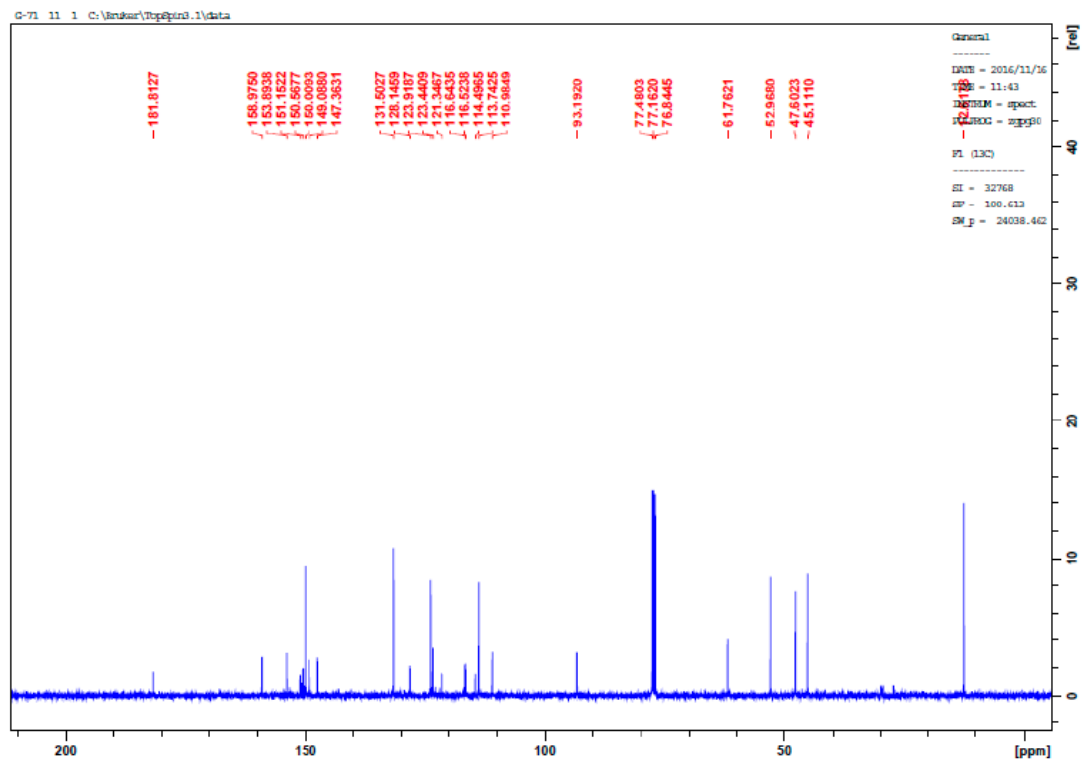Figure S43.  $^{13}\text{C}$ -NMR spectrum of compound 25.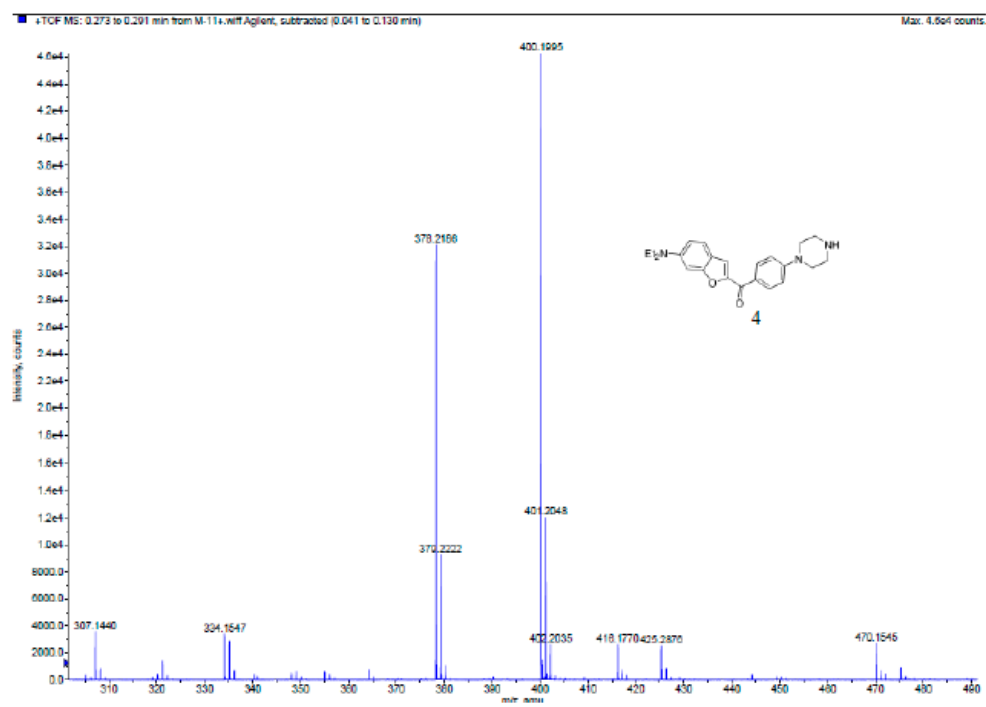

**Elemental composition calculator**

Target m/z: +400.1995 amu  
 Tolerance: -10.0000 ppm  
 Result type: Elemental  
 Max num of results: 100  
 Min DSE: -0.5000 Max DSE: +50.0000  
 Electron state: OddAndEven  
 Num of charges: 1  
 Add water: N/A  
 Add proton: N/A  
 File Name: M-11+.v11ff

|   | Element | Min Number | Max Number |
|---|---------|------------|------------|
| 1 | C       | 0          | 23         |
| 2 | F       | 0          | 0          |
| 3 | N       | 0          | 27         |
| 4 | O       | 0          | 0          |
| 5 | S       | 0          | 3          |
| 6 | Na      | 0          | 1          |
| 7 | Cl      | 0          | 0          |
| 8 | Br      | 0          | 0          |
| 9 | S       | 0          | 0          |

|   | Formula          | Calculated m/z (amu) | mDa Error | PPM Error | DSE  |
|---|------------------|----------------------|-----------|-----------|------|
| 1 | C23 H27 N3 O2 Na | 400.1995             | -0.0485   | -0.1211   | 11.5 |

Figure S44. HRMS spectrum of compound 4.

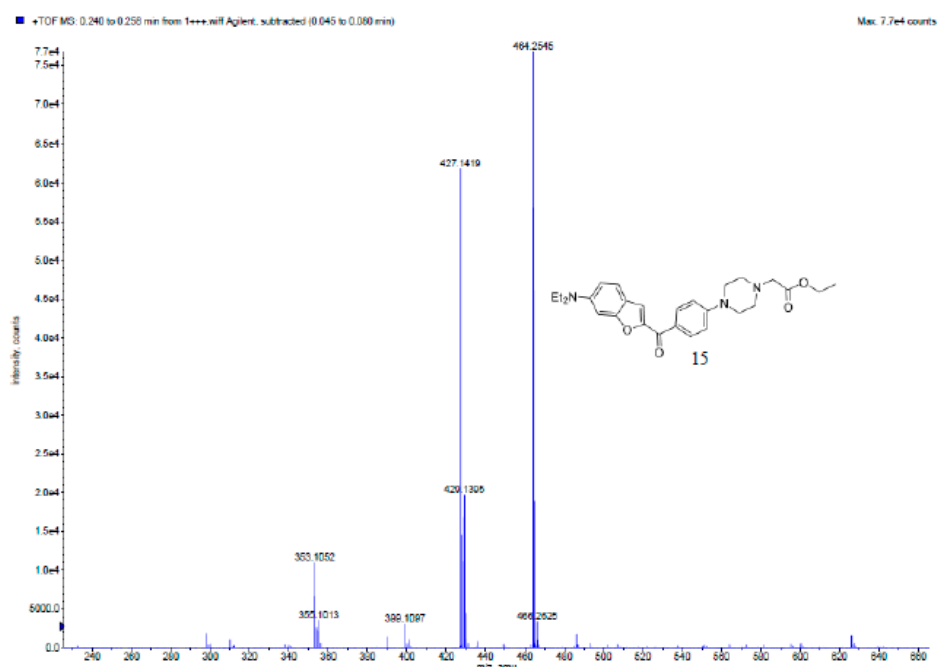

**Elemental composition calculator**

Target m/z: +464.2545 amu  
 Tolerance: +100.0000 ppm  
 Result type: Elemental  
 Max num of results: 100  
 Min DSE: -0.5000 Max DSE: +50.0000  
 Electron state: Even  
 Num of charges: 1  
 Add water: N/A  
 Add proton: N/A  
 File Name: 1+++ v11ff

|   | Element | Min Number | Max Number |
|---|---------|------------|------------|
| 1 | N       | 0          | 0          |
| 2 | C       | 0          | 27         |
| 3 | F       | 0          | 0          |
| 4 | H       | 0          | 34         |
| 5 | Cl      | 0          | 0          |
| 6 | N       | 0          | 0          |
| 7 | Na      | 0          | 1          |
| 8 | O       | 0          | 4          |
| 9 | S       | 0          | 0          |

|   | Formula       | Calculated m/z (amu) | mDa Error | PPM Error | DSE  |
|---|---------------|----------------------|-----------|-----------|------|
| 1 | C27 H24 N2 O4 | 464.2543             | 0.1104    | 0.2352    | 12.5 |

Figure S45. HRMS spectrum of compound 15.

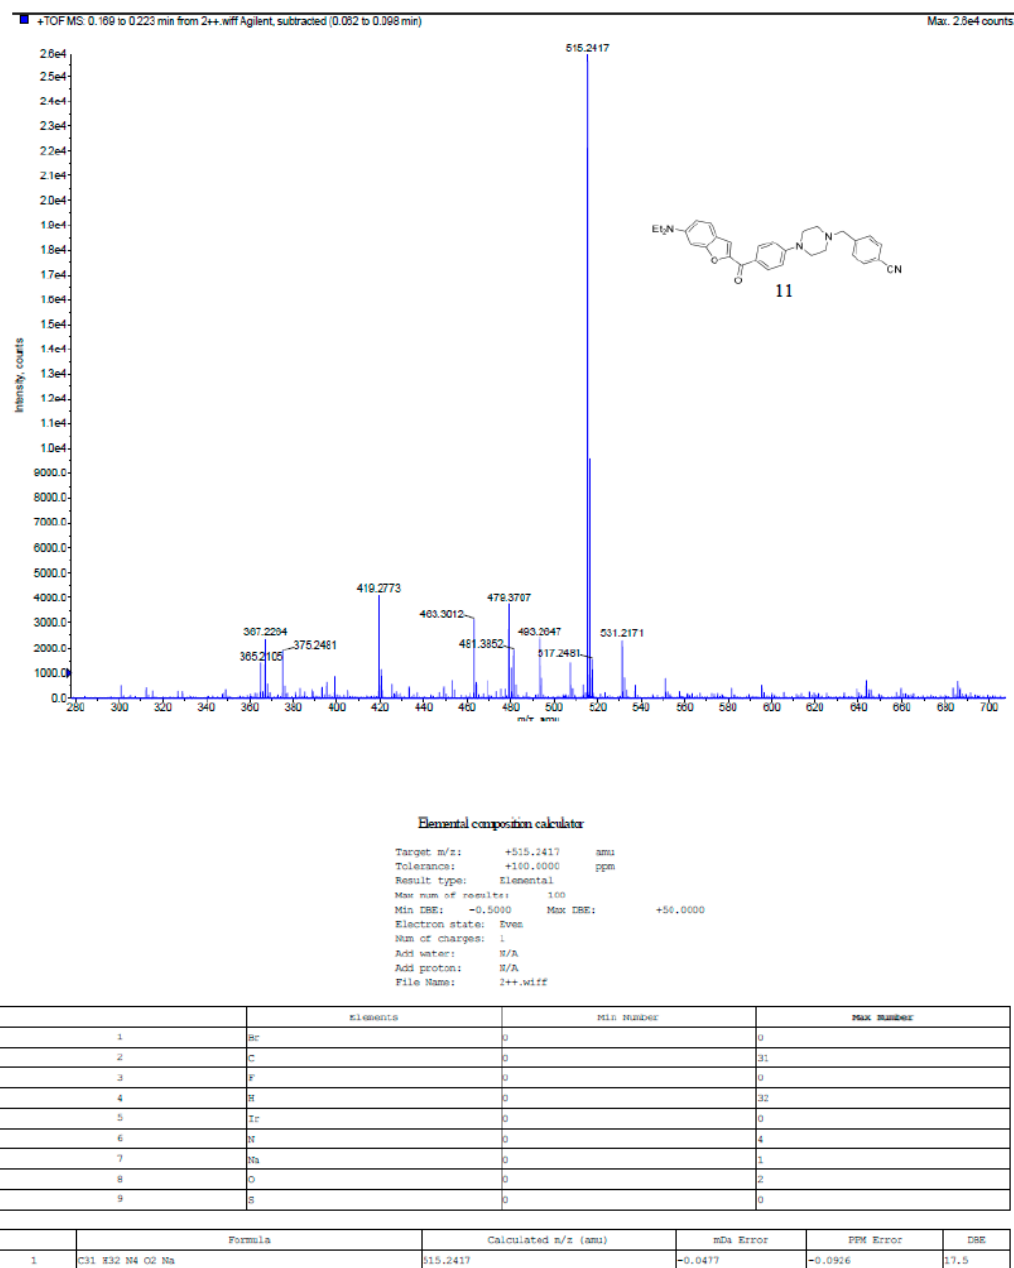

Figure S46. HRMS spectrum of compound 11.



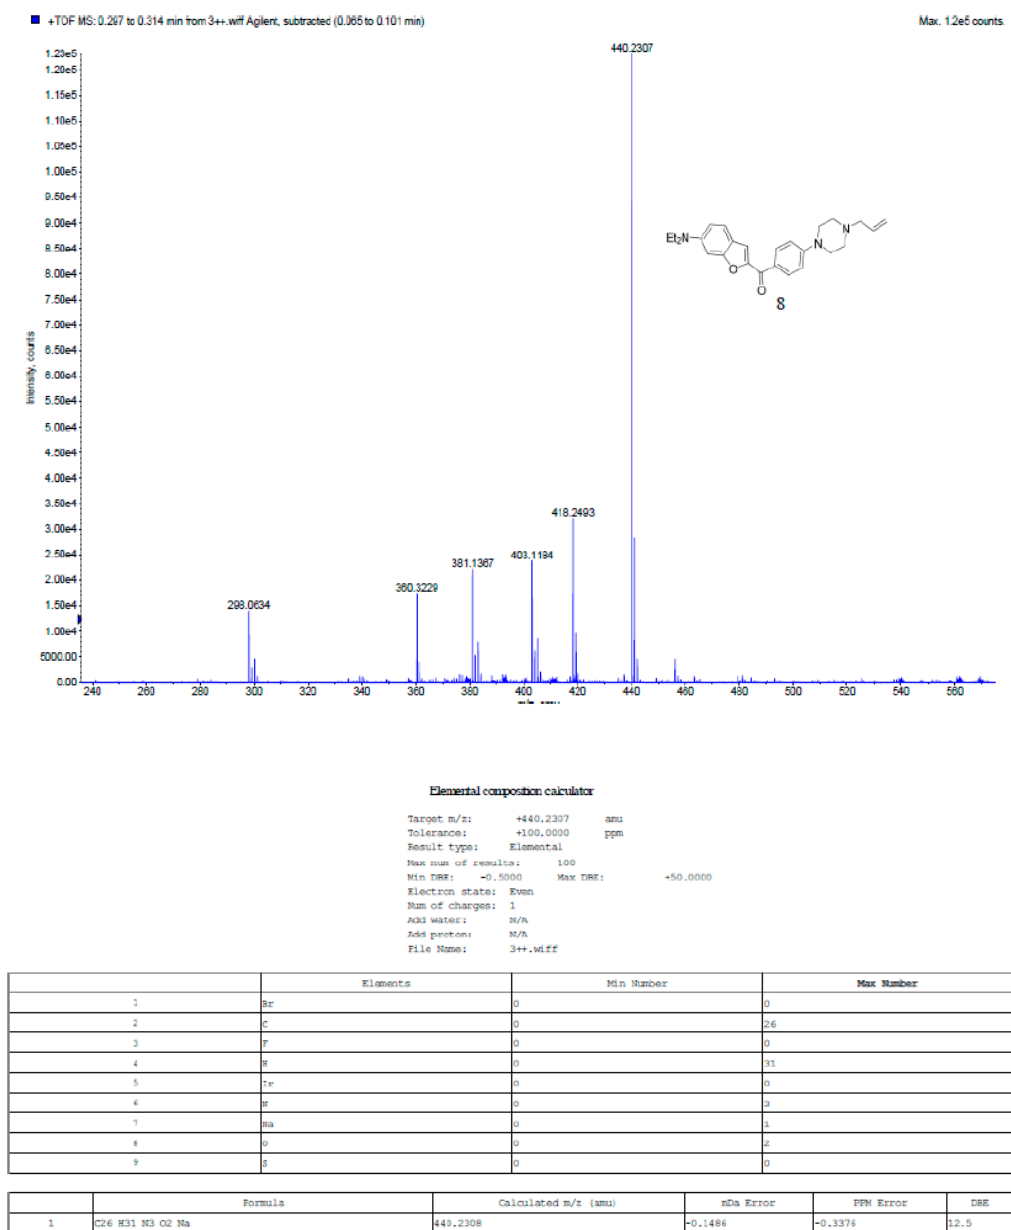

Figure S47. HRMS spectrum of compound 8.

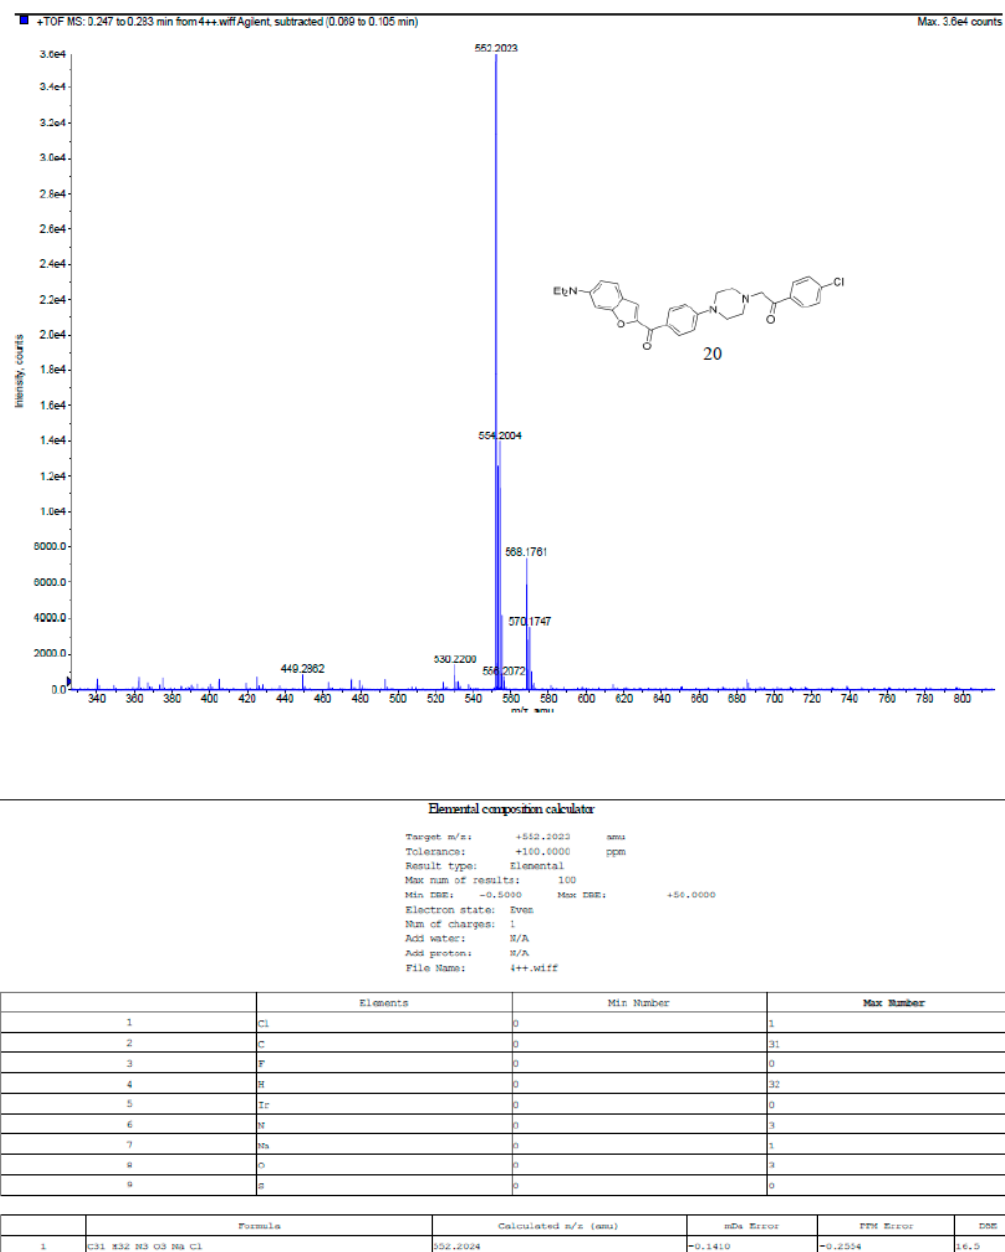

Figure S48. HRMS spectrum of compound 20.

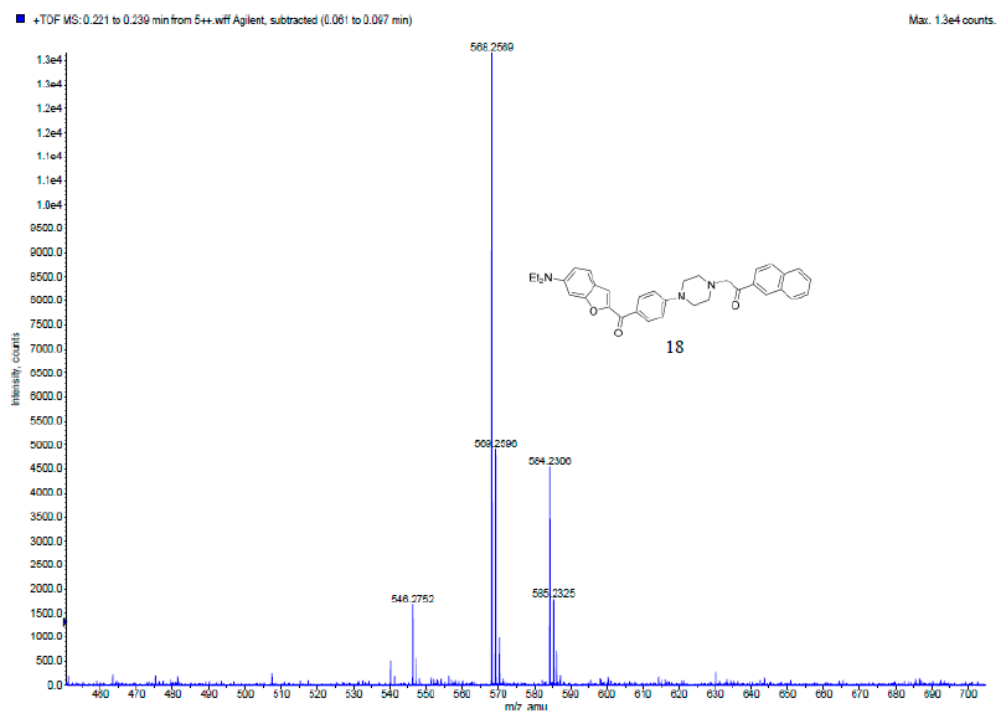

## Elemental composition calculator

Target m/z: +568.2569 amu  
 Tolerance: +10.0000 ppm  
 Result type: Elemental  
 Max num of results: 100  
 Min dB: -0.5000 Max dB: +10.0000  
 Electron state: Even  
 Min of charges: 1  
 Add water: N/A  
 Add proton: N/A  
 File Name: 5++.wiff

|   | Elements | Min Number | Max Number |
|---|----------|------------|------------|
| 1 | Cl       | 0          | 1          |
| 2 | C        | 0          | 35         |
| 3 | F        | 0          | 0          |
| 4 | H        | 0          | 35         |
| 5 | Ir       | 0          | 0          |
| 6 | N        | 0          | 3          |
| 7 | Na       | 0          | 1          |
| 8 | O        | 0          | 3          |
| 9 | S        | 0          | 2          |

  

|   | Formula                                                          | Calculated m/z (amu) | mDa Error | PPM Error | DBE  |
|---|------------------------------------------------------------------|----------------------|-----------|-----------|------|
| 1 | C <sub>26</sub> H <sub>31</sub> N <sub>3</sub> O <sub>3</sub> Na | 568.2570             | -0.1434   | -0.2574   | 14.5 |

Figure S49. HRMS spectrum of compound 18.

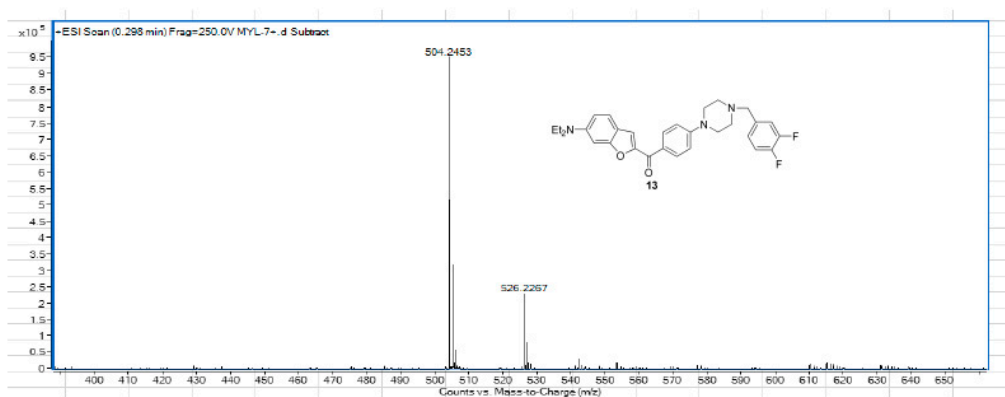

MS Formula Results: + Scan (0.298 min) Sub (MYL-7+.d)

| m/z      | Ion                | Formula          | Abundance |
|----------|--------------------|------------------|-----------|
| 504.2453 | (M+H) <sup>+</sup> | C30 H32 F2 N3 O2 | 952181.8  |

  

| Best | Formula (M)   | Ion Formula      | Score | Cross Score | Calc m/z | Diff (ppm) | Mass Match | Abund Match | Spacing Match |
|------|---------------|------------------|-------|-------------|----------|------------|------------|-------------|---------------|
| ✓    | C30 H31 F2 N3 | C30 H32 F2 N3 O2 | 99.19 |             | 504.2457 | 0.92       | 99.07      | 99.91       | 98.55         |

Figure S50. HRMS spectrum of compound 13.

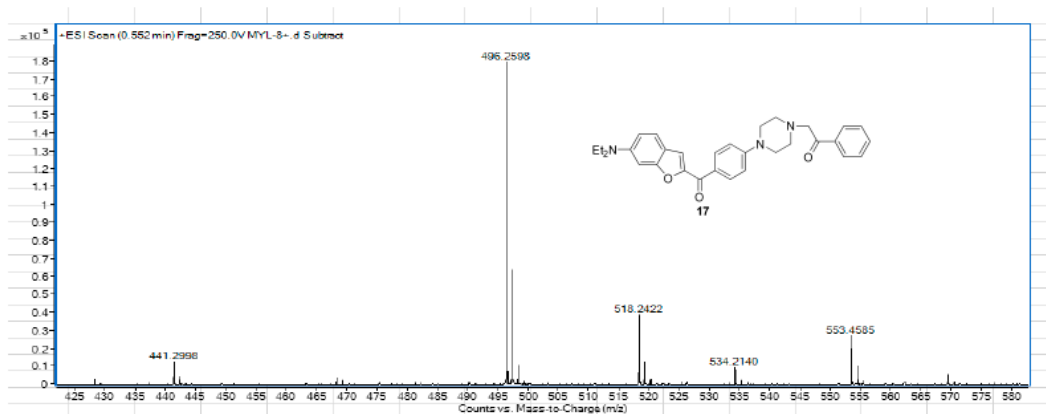

MS Formula Results: + Scan (0.552 min) Sub (MYL-8+.d)

| m/z      | Ion                | Formula       | Abundance |
|----------|--------------------|---------------|-----------|
| 496.2598 | (M+H) <sup>+</sup> | C31 H34 N3 O3 | 182076.2  |

  

| Best | Formula (M)   | Ion Formula   | Score | Cross Score | Calc m/z | Diff (ppm) | Mass Match | Abund Match | Spacing Match |
|------|---------------|---------------|-------|-------------|----------|------------|------------|-------------|---------------|
| ✓    | C31 H33 N3 O3 | C31 H34 N3 O3 | 98.98 |             | 496.2595 | -0.78      | 99.36      | 99.49       | 97.62         |

Figure S51. HRMS spectrum of compound 17.

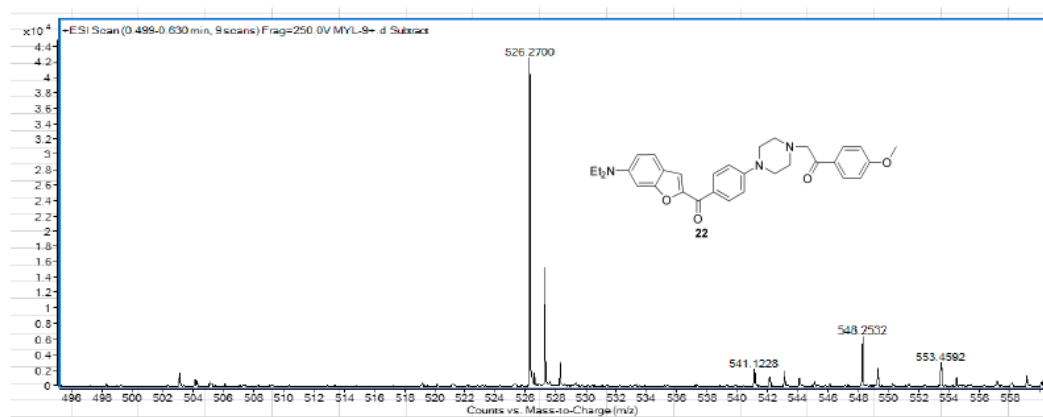

MS Formula Results: + Scan (0.499-0.630 min) Sub (MYL-9+.d)

| m/z    | Ion                | Formula       | Abundance |
|--------|--------------------|---------------|-----------|
| 526.27 | (M+H) <sup>+</sup> | C32 H36 N3 O4 | 42866.6   |

  

| Best                                | Formula (M)   | Ion Formula   | Score | Cross Score | Calc. m/z | Diff. (ppm) | Mass Match | Abund. Match | Spacing Match |
|-------------------------------------|---------------|---------------|-------|-------------|-----------|-------------|------------|--------------|---------------|
| <input checked="" type="checkbox"/> | C32 H35 N3 O4 | C32 H36 N3 O4 | 98.74 |             | 526.27    | -0.04       | 100        | 99.82        | 94.92         |

Figure S52. HRMS spectrum of compound 22.

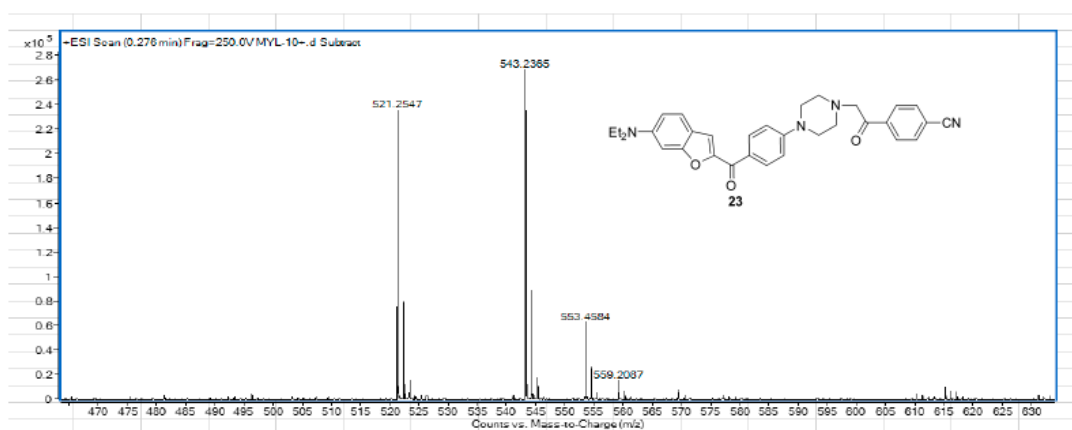

MS Formula Results: + Scan (0.276 min) Sub (MYL-10+.d)

| m/z      | Ion                | Formula       | Abundance |
|----------|--------------------|---------------|-----------|
| 521.2547 | (M+H) <sup>+</sup> | C32 H33 N4 O3 | 235941.4  |

  

| Best                                | Formula (M)   | Ion Formula   | Score | Cross Score | Calc. m/z | Diff. (ppm) | Mass Match | Abund. Match | Spacing Match |
|-------------------------------------|---------------|---------------|-------|-------------|-----------|-------------|------------|--------------|---------------|
| <input checked="" type="checkbox"/> | C32 H32 N4 O3 | C32 H33 N4 O3 | 99.08 |             | 521.2547  | 0.15        | 99.97      | 98.08        | 98.48         |

Figure S53. HRMS spectrum of compound 23.

## Qualitative Analysis Report

|                        |             |               |                    |
|------------------------|-------------|---------------|--------------------|
| Data Filename          | xp-1.d      | Sample Name   | xp-1               |
| Sample Type            | Sample      | Position      | P1-07              |
| Instrument Name        | Instrument1 | User Name     |                    |
| Acq Method             | SBL.m       | Acquired Time | 5/3/2016 3:15:08PM |
| IRM Calibration Status | Success     | DA Method     | ES1+.m             |
| Comment                |             |               |                    |

Sample Group Info.  
 Acquisition SW 6200 series TOF/5500 series  
 Version Q-TOF 8.05.01 (85125.2)

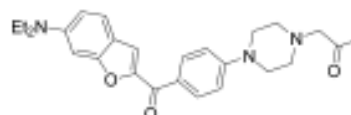

### User 3 spectra

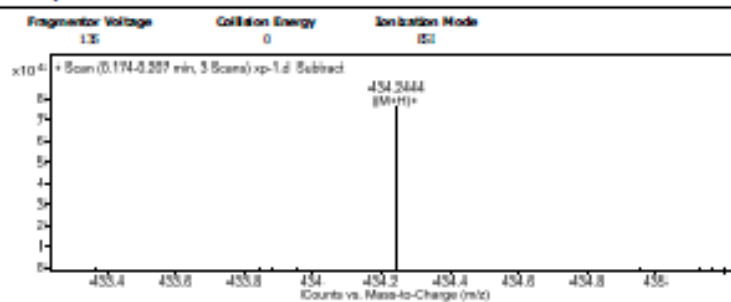

### Peak List

| m/z      | z | Abund    | Formula                                                       | Ion                |
|----------|---|----------|---------------------------------------------------------------|--------------------|
| 217.0264 | 2 | 8952.2   |                                                               |                    |
| 218.1264 | 2 | 2990.61  |                                                               |                    |
| 434.2444 | 1 | 76264.91 | C <sub>26</sub> H <sub>31</sub> N <sub>3</sub> O <sub>3</sub> | (M+H) <sup>+</sup> |
| 436.2475 | 1 | 21341.15 | C <sub>26</sub> H <sub>31</sub> N <sub>3</sub> O <sub>3</sub> | (M+H) <sup>+</sup> |
| 436.2495 | 1 | 3163.94  | C <sub>26</sub> H <sub>31</sub> N <sub>3</sub> O <sub>3</sub> | (M+H) <sup>+</sup> |
| 456.2261 | 1 | 11120.98 |                                                               |                    |
| 457.2292 | 1 | 2948.91  |                                                               |                    |
| 472.1999 | 1 | 2430.06  |                                                               |                    |

### Formula Calculator Element Limits

| Element | Min | Max |
|---------|-----|-----|
| C       | 3   | 60  |
| H       | 0   | 120 |
| O       | 0   | 30  |
| N       | 0   | 10  |

### Formula Calculator Results

| Formula                                                       | Calculated Mass | Calculated Mz | Mz       | Diff. (mDa) | Diff. (ppm) | DBE     |
|---------------------------------------------------------------|-----------------|---------------|----------|-------------|-------------|---------|
| C <sub>26</sub> H <sub>31</sub> N <sub>3</sub> O <sub>3</sub> | 433.2365        | 434.2438      | 434.2444 | -0.6        | -1.3        | 13.0000 |

--- End Of Report ---

Figure S54. HRMS spectrum of compound 16.

## Qualitative Analysis Report

|                        |             |               |                    |
|------------------------|-------------|---------------|--------------------|
| Data Filename          | xp-2.d      | Sample Name   | xp-2               |
| Sample Type            | Sample      | Position      | P1-BB              |
| Instrument Name        | Instrument1 | User Name     |                    |
| Acq. Method            | SLSI.m      | Acquired Time | 5/3/2016 3:16:10PM |
| IRM Calibration Status | Success     | DA Method     | ESI+.m             |

Sample Group: Info.  
 Acquisition SW: 6200 series TOF/6500 series  
 Version: Q-TOF 8.05.01 (85125.2)

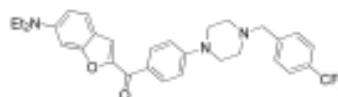

### User 3 spectra

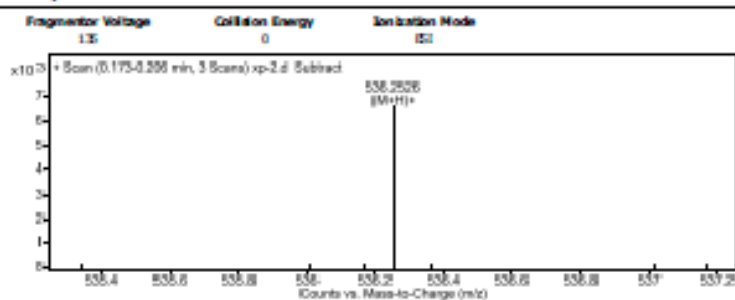

### Peak List

| m/z      | Z | Abund   | Formula          | Ion    |
|----------|---|---------|------------------|--------|
| 121.0500 | 1 | 8854.64 |                  |        |
| 277.1775 |   | 1434.44 |                  |        |
| 536.2526 | 1 | 8588.54 | C31 H32 F3 N3 O2 | (M+H)+ |
| 537.254  | 1 | 2069.8  | C31 H32 F3 N3 O2 | (M+H)+ |
| 558.235  | 1 | 1422.66 |                  |        |
| 574.209  | 1 | 1774.92 |                  |        |
| 607.4705 | 1 | 1835.52 |                  |        |
| 622.0098 |   | 4675.40 |                  |        |

### Formula Calculator Element Limits

| Element | Min | Max |
|---------|-----|-----|
| C       |     | 60  |
| H       |     | 120 |
| O       |     | 30  |
| N       |     | 10  |
| F       |     | 10  |

### Formula Calculator Results

| Formula          | Calculated Mass | Calculated Mz | Mz       | Diff. (mDa) | Diff. (ppm) | DBE     |
|------------------|-----------------|---------------|----------|-------------|-------------|---------|
| C31 H32 F3 N3 O2 | 535.2447        | 536.2519      | 536.2526 | -0.3        | -0.5        | 16.0000 |

--- End Of Report ---

Figure S55. HRMS spectrum of compound 12.

## Qualitative Analysis Report

|                               |              |                      |                     |
|-------------------------------|--------------|----------------------|---------------------|
| <b>Data Filename</b>          | xp-3.d       | <b>Sample Name</b>   | xp-3                |
| <b>Sample Type</b>            | Sample       | <b>Position</b>      | P1-09               |
| <b>Instrument Name</b>        | Instrument 1 | <b>User Name</b>     |                     |
| <b>Acq Method</b>             | S38.Lm       | <b>Acquired Time</b> | 5/3/2016 3:17:50 PM |
| <b>IRM Calibration Status</b> | Success      | <b>DA Method</b>     | ES1+.m              |
| <b>Comment</b>                |              |                      |                     |

**Sample Group**  
**Acquisition SW** 6200 series TOF/6500 series  
**Version** Q-TOF 8.05.01 (85125.2)

**Info.**

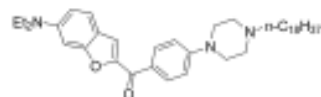

### User Spectra

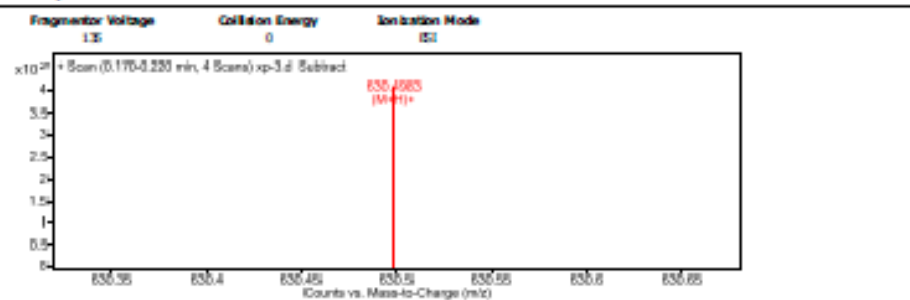

#### Peak List

| m/z      | z | Abund.  |
|----------|---|---------|
| 274.2747 | 1 | 2374.47 |
| 318.3003 | 1 | 1604.12 |
| 358.3685 | 1 | 2149.94 |
| 399.2565 | 1 | 1377.72 |
| 391.1634 | 1 | 1476.04 |
| 424.2822 | 1 | 1844.82 |
| 536.2526 | 1 | 2189.1  |
| 607.4688 |   | 1698.78 |

#### Formula Calculator Element Limits

| Element | Min | Max |
|---------|-----|-----|
| C       | 3   | 60  |
| H       | 0   | 120 |
| O       | 0   | 30  |
| N       | 0   | 10  |

#### Formula Calculator Results

| Formula       | Calculated Mass | Calculated Mz | Mz       | Diff. (mDa) | Diff. (ppm) | DBE     |
|---------------|-----------------|---------------|----------|-------------|-------------|---------|
| C41 H63 N3 O2 | 630.49920       | 630.4993      | 630.4983 | -0.7        | -1.1        | 12.0000 |

--- End Of Report ---

Figure S56. HRMS spectrum of compound 7.



## Qualitative Analysis Report

|                        |              |               |                     |
|------------------------|--------------|---------------|---------------------|
| Data Filename          | xp-4.d       | Sample Name   | xp-4                |
| Sample Type            | Sample       | Position      | P1-C1               |
| Instrument Name        | Instrument11 | User Name     |                     |
| Acq Method             | SBL.m        | Acquired Time | 5/3/2016 3:19:11 PM |
| IRM Calibration Status | Success      | DA Method     | ES14.m              |

Comment

Sample Group  
Acquisition SW 6200 series TOP/6500 series  
Version Q-TOF B.05.01 (B5125.2)

Info

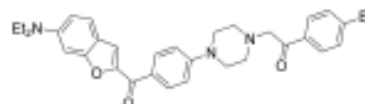

### User Spectra

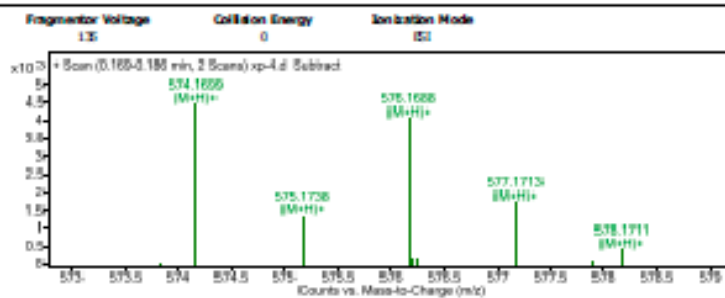

#### Peak List

| m/z      | z | Abund   | Formula          | Ion                |
|----------|---|---------|------------------|--------------------|
| 294.2066 |   | 1246.78 |                  |                    |
| 574.1699 | 1 | 4464.83 | C31 H32 Br N3 O3 | (M+H) <sup>+</sup> |
| 575.1738 | 1 | 1313.03 | C31 H32 Br N3 O3 | (M+H) <sup>+</sup> |
| 576.1688 | 1 | 4028.82 | C31 H32 Br N3 O3 | (M+H) <sup>+</sup> |
| 577.1713 | 1 | 1702.03 | C31 H32 Br N3 O3 | (M+H) <sup>+</sup> |
| 607.8572 | 1 | 1181.44 |                  |                    |
| 614.1236 |   | 1438.36 |                  |                    |
| 622.2098 |   | 1438.96 |                  |                    |

#### Formula Calculator Element Limits

| Element | Min | Max |
|---------|-----|-----|
| C       | 3   | 60  |
| H       | 0   | 120 |
| O       | 0   | 30  |
| N       | 0   | 10  |
| Br      | 0   | 5   |

#### Formula Calculator Results

| Formula          | Calculated Mass | Calculated $\Delta$ m/z | Mz       | Diff. (mDa) | Diff. (ppm) | DBE     |
|------------------|-----------------|-------------------------|----------|-------------|-------------|---------|
| C31 H32 Br N3 O3 | 573.1627        | 574.1700                | 574.1699 | -0.1        | -0.1        | 17.0000 |

--- End of Report ---

Figure S57. HRMS spectrum of compound 21.

## Qualitative Analysis Report

|                        |             |               |                     |
|------------------------|-------------|---------------|---------------------|
| Data Filename          | xp-5.d      | Sample Name   | xp-5                |
| Sample Type            | Sample      | Position      | P1-C2               |
| Instrument Name        | Instrument1 | User Name     |                     |
| Acq. Method            | S2BL.m      | Acquired Time | 5/3/2016 3:20:33 PM |
| IRM Calibration Status | Success     | DA Method     | ES1+.m              |

Sample Group  
 Acquisition SW 6200 series TOF/6500 series  
 Version Q-TOF 8.05.01 (85125.2)

Info

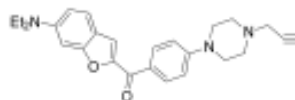

### User Spectra

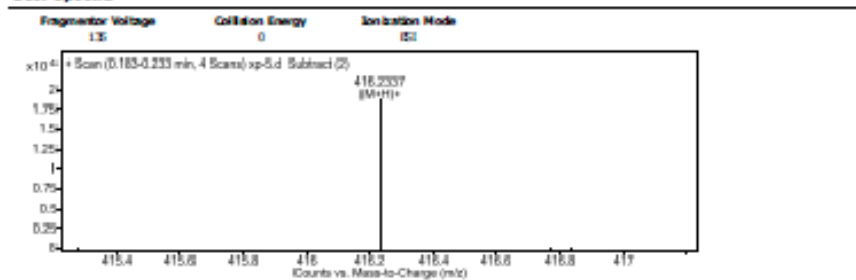

### Peak List

| m/z      | z | Abund.   | Formula                                                       | Ion                |
|----------|---|----------|---------------------------------------------------------------|--------------------|
| 359.257  | 1 | 1.795.73 |                                                               |                    |
| 407.1378 | 1 | 1684.78  |                                                               |                    |
| 416.2337 | 1 | 18712.71 | C <sub>26</sub> H <sub>29</sub> N <sub>3</sub> O <sub>2</sub> | (M+H) <sup>+</sup> |
| 417.2373 | 1 | 5685.55  | C <sub>26</sub> H <sub>29</sub> N <sub>3</sub> O <sub>2</sub> | (M+H) <sup>+</sup> |
| 438.2156 | 1 | 3498.21  |                                                               |                    |
| 454.1889 | 1 | 3801.03  |                                                               |                    |
| 454.2494 | 1 | 6063.16  |                                                               |                    |
| 455.2515 | 1 | 2248.17  |                                                               |                    |

### Formula Calculator Element Limits

| Element | Min | Max |
|---------|-----|-----|
| C       | 3   | 60  |
| H       | 0   | 120 |
| O       | 0   | 30  |
| N       | 0   | 10  |

### Formula Calculator Results

| Formula                                                       | Calculated Mass | Calculated Mz | Mz       | Diff. (mDa) | DM (ppm) | DBE     |
|---------------------------------------------------------------|-----------------|---------------|----------|-------------|----------|---------|
| C <sub>26</sub> H <sub>29</sub> N <sub>3</sub> O <sub>2</sub> | 415.2240        | 416.2333      | 416.2337 | -0.5        | -1.2     | 14.0000 |

--- End Of Report ---

Figure S58. HRMS spectrum of compound 9.

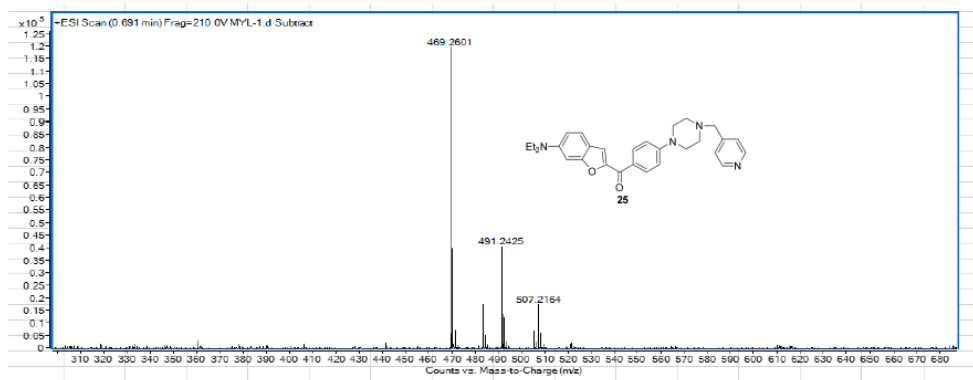

## MS Formula Results: + Scan (0.691 min) Sub (MYL-1.d)

| m/z      | Ion                | Formula       | Abundance |
|----------|--------------------|---------------|-----------|
| 469.2601 | (M+H) <sup>+</sup> | C29 H33 N4 O2 | 121334.3  |

  

| Best                                | Formula (M)   | Ion Formula   | Score | Cross Score | Calc m/z | Diff (ppm) | Mass Match | Abund Match | Spacing Match |
|-------------------------------------|---------------|---------------|-------|-------------|----------|------------|------------|-------------|---------------|
| <input checked="" type="checkbox"/> | C29 H32 N4 O2 | C29 H33 N4 O2 | 99.14 |             | 469.2598 | -0.7       | 99.5       | 99.37       | 98.14         |

Figure S59. HRMS spectrum of compound 25.
